1 RESEARCH ARTICLE

# 2 Alpha Neurofeedback Training with a portable Low- 3 Priced and Commercially Available EEG Device 4 Leads to Faster Alpha Enhancement

5 A Single-blind, Sham-feedback Controlled Study & Methodological Review

6 Adrian Naas<sup>1\*</sup>, João Rodrigues<sup>2</sup>, Jan-Philipp Knirsch<sup>1</sup>, Andreas Sonderegger<sup>1,3</sup>

7 <sup>1</sup> Université de Fribourg (UNIFR), Fribourg/Freiburg, Switzerland,

8 <sup>2</sup> École Polytechnique Fédérale de Lausanne (EPFL), Lausanne, Switzerland,

9 <sup>3</sup> EPFL+ECAL Lab, Renens, Switzerland

10 \* [adrian.naas@unifr.ch](mailto:adrian.naas@unifr.ch)

## 11 Abstract

### 12 Introduction

13 Findings of recent studies have proposed that it is possible to enhance cognitive capacities of healthy  
14 individuals by means of individual upper alpha (around 10 to 13.5 Hz) neurofeedback training.  
15 Although these results are promising, most of this research was conducted based on high-priced EEG  
16 systems developed for clinical and research purposes only. This study addresses the question whether  
17 such effects can also be shown with an easy to use and comparably low priced Emotiv Epop EEG  
18 headset available for the average consumer. In addition, critical voices were raised regarding the control  
19 group designs of studies addressing the link between neurofeedback training and cognitive performance.  
20 Based on an extensive literature review revealing considerable methodological issues in an important  
21 part of the existing research, the present study addressed the question whether individual upper alpha  
22 neurofeedback has a positive effect on alpha amplitudes (i.e. increases alpha amplitudes) and short-term  
23 memory performance focussing on a methodologically sound, single-blinded, sham controlled design.

### 24 Method

25 Participants (N = 33) took part in four test sessions over four consecutive days of either neurofeedback  
26 training or sham feedback (control group). In the experimental group, five three-minute periods of visual  
27 neurofeedback training were administered each day whereas in the control group, the same amount of  
28 sham feedback was presented. Performance on eight digit-span tests as well as participants' affective  
29 states were assessed before and after each of the daily training sessions.

### 30 Results

31 Participants in the neurofeedback training (NFT) group showed faster and greater alpha enhancement  
32 compared to the control group. Contrary to the authors' expectations, alpha enhancement was also  
33 observed in the control group. Surprisingly, exploratory analyses showed a significant correlation  
34 between the initial alpha level and the alpha improvement during the course of the study. This finding  
35 suggests that participants with high initial alpha levels profit more from alpha NFT interventions. digit-  
36 span performance increased in both groups over the course of time. However, the increase in individual  
37 upper relative alpha did not explain significant variance of digit-span improvement. In the discussion,  
38 the authors explore the appearance of the alpha enhancement in the control group and possible reasons  
39 for the absence of a connection between NFT and short-term memory.

40

41 Keywords: neurofeedback, alpha, cognitive enhancement, method, single-blind, sham-feedback, short-  
42 term memory, working memory, healthy, Emotiv

---

43

## 44 **1. Introduction**

45 An alarming indicator for the need of cognitive enhancement in our society is the growing number of  
46 college students using drugs like Methylphenidate (MPH, Ritalin) or Modafinil to enhance  
47 concentration, memory performance and wakefulness (16% on some college campuses, see e.g. [1–3]).  
48 Rather than demonising the need for cognitive enhancement, the aim of this piece of research is to  
49 examine the usefulness of the non-invasive technique of neurofeedback training (NFT) for cognitive  
50 enhancement. Previous research addressing this question has reported some evidence for a positive  
51 relationship. However, to the authors' knowledge, no study has tested the effectiveness of NFT with a  
52 not-medical grade EEG. This gap in current research, leaves the average consumer torn between the  
53 glorious slogans of a booming BCI industry with their easy-to-use and low-priced devices and a  
54 common sense which tries to disentangle advertising from possibility and innovation. On top of that,  
55 the task is complicated by science, which works beyond the omnipresent publication bias [e.g. 4] with  
56 methodologically problematic designs like no-intervention control groups.

57 Summing up, this piece of research focuses on two aspects. Firstly, it aims at the investigation of the  
58 effectiveness of alpha NFT with an easy to use and low priced EEG Headset and a corresponding  
59 software. Secondly, it provides an overview regarding methodological aspects in the field of alpha NFT  
60 and cognitive enhancement. Or, to put it differently, the authors humbly try to support average  
61 consumers when they are faced with questions like “If I train with an *Emotiv Epoc* and the corresponding  
62 software, will my short-term memory get better?”.

63 But before we can answer this question, a short introduction into NFT shall be given. NFT is a process  
64 during which subjects learn to influence their EEG pattern, for example by enhancing their individual  
65 upper alpha (IUA) amplitude [5]. However, other EEG components like the amplitude of different EEG  
66 frequency bands e.g. theta, alpha or beta can be fed back as well. The feedback can be provided as bar  
67 graph [6], colour code [7] or as a function of different sounds [8]. In combination with a mental strategy  
68 (e.g. thinking about friends, [9]), the users can shape their brain activity into a certain direction (for  
69 instance enhance alpha activity), which in the case of alpha is considered to be beneficial for cognitive  
70 performance [10]. NFT can be seen as non-invasive technique to alter brain activity. Unlike for example  
71 transcranial magnetic stimulation (TMS), NFT does not interfere actively with the brain but serves  
72 merely as a mirror of the current amplitude of the target frequency band.

73 To sum up, NFT can be described as a process during which neural activity is consecutively shaped into  
74 a predefined direction, by applying a mental strategy (e.g. visualizing engaging in a hobby) which is  
75 adjusted during a circular learning process (see Figure 3), based on a EEG feedback (e.g. colour scheme,  
76 sounds), in combination with conditioning procedures (reward processes, symbols or sounds). This  
77 process of altering oscillatory cerebral activity to increase the individual upper alpha amplitudes can,  
78 according to some authors [5,11,12], positively influence cognitive performance.

79 For a contribution to the understanding of the connection between NFT and cognitive enhancement, the  
80 study at hand follows three different purposes. Firstly, we aimed at replicating findings of previous  
81 experiments which indicated beneficial effects of individual upper alpha NFT on cognitive performance  
82 [5,13], while secondly taking a step into the direction of the average consumer by choosing an affordable  
83 device which is easy to use. Thirdly, an overview of methodological aspects like control group designs  
84 and blindfolding of publications in the field of alpha NFT and cognitive performance shall be given.  
85 Before these three areas of interest are explored more in detail, a short introduction into the origin of  
86 NFT is be given.

## 87 **1.1. The Origin of Neurofeedback Training**

88 The use of NFT in medical and therapeutic contexts has gained increasing interest in research and  
89 practice over the past 50 years (e.g. [14–17]). Various studies indicated that NFT shows positive effects  
90 in the treatment of diseases like Attention Deficit Hyperactive Disorder, Autism Spectrum Disorder,  
91 Substance Use Disorder and Epilepsy (e.g. [14–24]). Also with regard to other disorders (e.g. General  
92 Anxiety Disorder, see [29]), there are some studies suggesting positive effects of NFT. Recently, a first  
93 pilot study investigating the usefulness of NFT as intervention technique for patients suffering from  
94 Alzheimer Disease (AD) revealed that “neurofeedback, in combination with treatment with  
95 cholinesterase inhibitors, may be a potential treatment by which the progressive deterioration in patients  
96 with AD can be stabilized” [30]. Finally, NFT seems to facilitate effectively the lives of people affected  
97 by Amyotrophic Lateral Sclerosis or the so-called Locked-in Syndrome [31].

98 In the field of therapeutic application of NFT, one of the best established application domains is the  
99 treatment of Attention Deficit Hyperactive Disorder. Different studies have shown positive results of a  
100 NFT intervention. For example Linden et al. [32] conducted a study with an intensive training schedule  
101 of forty 45-min sessions of NFT over a period of 6 months. The training aimed at enhancing beta activity  
102 and suppressing theta activity at the electrode sites Cz and Pz (international 10-20 system). NFT was  
103 given by means of computer games and conditioning was enhanced by rewarding the participants with  
104 small gifts after the intervention, if the level of performance was satisfying. After the training course,  
105 the experimental group performed significantly better compared to the waiting list control group and  
106 compared to the individual pre-course measurement on both, an IQ-Test (*K-Bit IQ*) and a parent  
107 behaviour rating scale for inattention.

108

## 109 **1.2. Alpha Neurofeedback Training for Cognitive Enhancement in Healthy** 110 **Participants**

111 Because of its positive effects in clinical practice, there has been increasing interest in the question  
112 whether NFT can influence the capacities of healthy individuals positively as well. Some studies seem  
113 to support this hypothesis [33] and according to Klimesch [12], especially the individual upper alpha  
114 band is of major importance for cognitive performance.

115 The individual upper alpha band is generally calculated based on EEG data. By means of Fast Fourier  
116 Transformation (FFT) the rhythmic EEG components delta (about 0.5 – 4 Hz), theta (about 4 – 8 Hz),  
117 alpha (about 8 – 13 Hz) and beta (about 13 – 30 Hz) can be extracted. The IUA constitutes a sub-band

118 of the alpha component and is located between the individual alpha peak (IAP, between 7.5 and 12.5  
119 Hz) and IAP + 2 Hz [12].

120 The ‘amount’ of alpha activity can be expressed in terms of amplitude or power. Working with  
121 amplitude instead of power values has the advantage that it prevents excessive skewing and improves  
122 the validity of the statistical analysis [6]. Sometimes (e.g. [34]), instead of amplitude values, relative  
123 alpha values are calculated by dividing the mean amplitude of the individual upper alpha band by the  
124 mean amplitude of the whole EEG. This normalization avoids variance in the absolute alpha amplitude  
125 caused by changes between trials due to changes in impedance between the electrodes and the scalp. By  
126 normalizing, the frequency band of interest is relativized, which mitigates the issue of attenuations  
127 caused by external factors, which affect all frequency bands equally [6].

128 Alpha is an especially interesting oscillation that the human brain exhibits. It’s the predominant rhythm  
129 in the human brain in a resting state, especially when eyes are closed [35]. Until the 80’s, Alpha NFT  
130 was considered as a simple relaxation training, located within the theoretical framework of unitary  
131 arousal models. Only during the 90’s, new interest arose and from then on many different research  
132 questions circulated around the alpha frequency band [36], which will be outlined in the following  
133 paragraphs.

134 The first alpha property we want to consider is the association between individual alpha peak position  
135 and cognitive performance and neurological disorders, respectively. After conducting a FFT, the data  
136 can be plotted in a frequency spectrum map. In resting state recordings, the alpha peak is clearly visible  
137 between 7.5 and 12.5 Hz and constitutes one of the strongest components of the FFT. Higher alpha peak  
138 frequencies (e.g. 12 Hz in comparison to 10 Hz) correlate negatively with neurological disorders and  
139 with low age and high age. Furthermore, higher alpha peak frequencies correlate positively with high  
140 memory performance [37,38] and IQ [39].

141 Another property of the alpha activity is the connection between alpha amplitude/power and cognitive  
142 performance. For example Neubauer and colleagues [40] found a positive correlation between  
143 individual upper alpha amplitude and IQ. More specifically, high alpha power during a resting state and  
144 low alpha power during the execution of a task was associated with good performance in semantic long-  
145 term memory tasks [12]. According to Klimesch [12], alpha shows a task-related desynchronization, it  
146 increases during resting states (especially when eyes are closed) and decreases during performance of a  
147 cognitive task (e.g. mental calculations). Therefore, it seems to be a promising approach to mimic the  
148 phenomena observed in good performers by means of NFT (enhanced alpha power during a resting  
149 period shortly before the short-term memory task) in order to enhance cognitive performance.

150 Interestingly, past studies [12] observed the connection between alpha desynchronization and cognitive  
151 performance only when the alpha band was divided into two sub-bands: upper and lower alpha.  
152 Klimesch located the upper alpha band between the individual alpha peak (IAP, between 7.5 and 12.5  
153 Hz) and IAP + 2 Hz and stated that the lower alpha band is connected to a “variety of non-task and non-  
154 stimulus specific factors which may be subsumed under the term ‘attention’ [...] and reflect general  
155 task demands” [12]. This author located the lower alpha band between IAP - 4 and IAP. Therefore, in  
156 most of the studies, the individual upper alpha (IUA) band was used for NFT and some researchers go  
157 as far as assessing the alpha band each test session anew.

158 A study of high importance for the development of IUA feedback addressed the topic by means of  
159 transcranial magnetic stimulation in a within-subject design [33]. In line with the correlational findings  
160 between alpha desynchronization and cognitive performance, the participants were stimulated to  
161 produce more IUA activity (individual alpha peak + 1 Hz) at P6 and Fz before the execution of a task.  
162 In this way, the natural desynchronization process which can be found in participants showing high  
163 cognitive performance (i.e. mental rotation and short-term memory performance) was mimicked. In the  
164 control condition, participants also ‘underwent’ transcranial magnetic stimulation, but the coil was  
165 rotated by 90° so the participants did not receive any stimulation. The results show a significant increase  
166 of IUA during transcranial magnetic stimulation in the experimental condition, as well as decreased test  
167 power, resulting in a large event-related desynchronization. None of these changes were observed in the  
168 control condition. Cognitive performance was assessed in terms of success in a *Mental Rotation Task*.  
169 Results showed that mental rotation performance in the experimental condition was higher compared to  
170 the control condition. The authors interpreted these findings as an indicator for a causal relationship  
171 between IUA activity and cognitive performance in healthy subjects.

172 Based on these findings, several studies examined the connection between IUA activity and cognitive  
173 performance. In those studies, different aspects of cognitive performance like short-term memory  
174 performance or working memory performance were assessed via a *digit-span Task* or a *Conceptual*  
175 *Span Task* (e.g. [5,41]), or *Mental Rotation Task* [42]. Mental flexibility and executive functions were  
176 assessed via the *Trail Making Test* [43], or creativity by the *Unusual Uses Test* [44]. Summarizing the  
177 results of these studies, imply a positive connection between individual upper alpha NFT and different  
178 aspects of cognitive performance like working memory/STM and visuospatial rotation. Whether the  
179 relationship between IUA and STM is of causal or correlational character, which underlying  
180 mechanisms lead to the enhancing effect of individual upper alpha NFT on cognitive performance and  
181 whether unspecific environmental factors of the experimental setup play a key role in the process of  
182 NFT is still not fully understood at the moment. In the following section, some of these aspects are  
183 addressed by a comprehensive analysis of published studies addressing the link between IUA and  
184 cognitive performance.

185

### 186 **1.3. Summary of Experimental Studies on Neurofeedback Training and** 187 **Cognitive Performance**

188 This section summarizes findings of studies addressing the link between IUA and cognitive  
189 performance. Inspired by Rogala and colleagues [45], Table 1 gives an overview of the existing  
190 experimental research addressing NFT training (Alpha and Alpha/Theta) and its effects on behavioural  
191 measurements of attention (column “A”) and memory (column “M”). Column “G” represents general  
192 success and subsumes general effects of the training obtained in any of the investigated measures other  
193 than memory and attention. Studies regarding Alpha NFT and Memory were highlighted grey and  
194 methodological aspects which deserve critical attention are marked bold. The overview contains studies  
195 that appear in [45] (marked with an asterisk \*) as well as new research that has not been considered in  
196 their review. Inclusion criteria were that the studies used alpha as feedback frequency and the dependent  
197 variable was not a clinical outcome. The studies vary with regard to the feedback direction  
198 (upwards/increment or downwards/decrement, marked as + or -) and its effect on different behavioural

199 outcomes. This overview does not claim to be complete but rather constitutes the result of our extensive  
 200 literature search in this field of research.

**Table 1. Overview of Existing Experimental Research Addressing Alpha NFT and its Effects on Behavioural Measurements**

| N°  | First Author       |          | Protocol             | EEG | Behaviour |   |   | Methodological Considerations                                                                                                                                                    |
|-----|--------------------|----------|----------------------|-----|-----------|---|---|----------------------------------------------------------------------------------------------------------------------------------------------------------------------------------|
|     | Year               | Citation |                      |     | G         | A | M |                                                                                                                                                                                  |
| 1   | Agnoli<br>2018     | [46]     | Alpha+               | 1   | 1         |   |   | Alpha NFT Group<br>Beta NFT Group<br>Sham Feedback Group<br>Random group assignment, single-blind                                                                                |
| 2   | Alexeeva<br>2012   | [47]     | Alpha+               | 1   | 1         |   |   | Alpha NFT Group<br>Sham Feedback Group<br>Assignment balanced for several variables<br><b>No blindfolding</b>                                                                    |
| 3*  | Allen<br>2001      | [48]     | Alpha<br>(Asymmetry) | 1   | 1         |   |   | Right/left Alpha Facilitation NFT Group<br>Left/right Alpha Facilitation NFT Group<br>Random group assignment, single-blind                                                      |
| 4   | Batty<br>2006      | [49]     | Theta+/Alpha+        | 1   | 0         |   |   | A/T NFT Group<br>Muscle Relaxation Group<br>Self-Hypnosis Group<br>Random group assignment, single-blind                                                                         |
| 5   | Bazanova<br>2007   | [50]     | Alpha+               | 1   | 1         |   |   | <b>Alpha NFT + Muscle Relaxation Group</b><br>Dance Training Control Condition<br>Longitudinal Design<br><b>No counterbalancing of condition order</b><br><b>No blindfolding</b> |
| 6*  | Van Boxtel<br>2012 | [51]     | Alpha+               | 1   | 0         |   |   | Alpha NFT Group<br>Random Beta NFT Group<br>Music-listening Control Group<br>Random group assignment, double-blind                                                               |
| 7*  | Chisholm<br>1977   | [52]     | Alpha+               | 1   | 0         |   |   | Alpha NFT Group<br>Sham Feedback Group<br>Music-listening Control Group<br>Random group assignment, single-blind                                                                 |
| 8*  | DeGood<br>1977     | [53]     | Alpha+               | 0   |           |   |   | Alpha NFT Group<br>Alpha-down NFT Group<br>EMG-down Group, EMG-up Group<br>Assignment balanced for sex, single-blind                                                             |
| 9   | Dekker<br>2014     | [54]     | Alpha+               | 1   |           |   |   | Alpha NFT Group<br><b>No Control Group</b><br>Single-blind                                                                                                                       |
| 10* | Egner<br>2002      | [55]     | Theta+/Alpha-        | 0   | 0         |   |   | A/T NFT Group<br>Sham Feedback Group<br>Random group assignment, single-blind                                                                                                    |

| First Author |                   | Citation | Protocol      | EEG | G | A | M | Methodological Considerations                                                                                                                                                            |
|--------------|-------------------|----------|---------------|-----|---|---|---|------------------------------------------------------------------------------------------------------------------------------------------------------------------------------------------|
| N°           | Year              |          |               |     |   |   |   |                                                                                                                                                                                          |
| 11           | Egner<br>2003     | [56]     | Theta+/Alpha- | 1   | 1 |   |   | A/T NFT Group<br>Control NFT Groups<br>Other Control Intervention Groups<br>Random group assignment<br><b>No information on blinding</b>                                                 |
| 12           | Egner<br>2004     | [57]     | Theta+/Alpha- | 1   |   |   |   | A/T NFT Group<br>Low Beta NFT Group<br>Beta1 NFT Group<br>Random assignment,<br><b>No information on blinding</b>                                                                        |
| 13           | Escolano<br>2011  | [58]     | Alpha+        | 1   |   |   | 1 | Alpha NFT Group<br><b>No-Intervention Control Group</b><br>(took only part in the memory test)<br>Random group assignment, <b>no blinding</b>                                            |
| 14           | Escolano<br>2012  | [59]     | Alpha+        | 1   | 0 |   |   | Alpha NFT Group<br>Sham Feedback Group<br>Random group assignment, double-blind                                                                                                          |
| 15           | Escolano<br>2014  | [60]     | Alpha+        | 1   | 0 |   |   | Alpha NFT Group<br>Sham Feedback Group<br>Random Group assignment, single-blind                                                                                                          |
| 16           | Gruzelier<br>2014 | [61]     | Theta+/Alpha- | 1   | 1 |   |   | A/T NFT Group<br>SMR NFT Group<br><b>No-Intervention Control Group</b><br>Group assignment balanced for several variables<br><b>No information on blinding</b>                           |
| 17           | Gruzelier<br>2014 | [62]     | Theta+/Alpha- | 1   | 1 | 1 |   | A/T NFT Group<br>SMR NFT Group<br><b>No-Intervention Control Group.</b><br>Group assignment balanced for several variables<br><b>No information on blinding</b>                          |
| 18           | Gruzelier<br>2014 | [63]     | Theta+/Alpha- | 1   | 1 |   |   | A/T NFT Group<br>HRV Feedback Training Group, Instruction Group<br><b>No-Intervention Control Group</b><br>Random group assignment<br><b>No information on blinding</b>                  |
| 19           | Guez<br>2015      | [64]     | Alpha+        | 0   |   |   | 1 | Alpha NFT Group<br>SMR NFT Group<br>Sham Feedback Group<br>Random group assignment, double-blind                                                                                         |
| 22           | Hanslmayr<br>2005 | [42]     | Alpha+        | 1   | 1 |   |   | Counterbalanced Alpha & Theta NFT Conditions<br><b>No Control Condition</b><br>Longitudinal Design<br><b>No information on condition assignment</b><br><b>No information on blinding</b> |

| First Author |                   | Citation | Protocol                       | EEG | G | A | M | Methodological Considerations                                                                                                                                                                                                                        |
|--------------|-------------------|----------|--------------------------------|-----|---|---|---|------------------------------------------------------------------------------------------------------------------------------------------------------------------------------------------------------------------------------------------------------|
| N°           | Year              |          |                                |     |   |   |   |                                                                                                                                                                                                                                                      |
| 23           | Hsueh<br>2016     | [65]     | Alpha+                         | 1   |   |   | 1 | Alpha NFT Group<br>Random Frequency NFT Control Group<br>Group assignment balanced for several variables<br><b>No information on blindfolding</b>                                                                                                    |
| 25           | Imperator<br>2017 | [66]     | Theta+/Alpha-                  | 1   | 1 |   |   | A/T NFT & autogenic training Group<br><b>Waiting List Control Group</b><br>Group assignment balanced for sex, single-blind                                                                                                                           |
| 26*          | Konareva<br>2005  | [67]     | Alpha+/ Theta-                 | 0   |   |   |   | A/T NFT Group<br>Music Listening Control Group<br>Random group assignment<br><b>No information on blindfolding</b>                                                                                                                                   |
| 27           | Nan<br>2012       | [5]      | Alpha+                         | 1   |   |   | 1 | Alpha NFT Group<br><b>No-Intervention Control Group</b><br>Random group assignment<br><b>No information on blindfolding</b>                                                                                                                          |
| 29           | Nan<br>2013       | [68]     | Alpha+                         | 1   | 1 |   |   | Alpha NFT Group<br><b>No-Intervention Control Group</b><br>Random group assignment<br><b>No information on blindfolding</b>                                                                                                                          |
| 30           | Raymond<br>2005   | [69]     | Alpha+/Theta+                  | 1   | 1 |   |   | Alpha NFT Group + Instructions<br>HRV Feedback Group + Instructions<br>No-Intervention Control Group<br>Random group assignment, <b>no blindfolding</b>                                                                                              |
| 31*          | Reis<br>2015      | [70]     | Alpha+                         | 1   | 1 |   | 1 | Alpha, Theta NFT Group (longitudinal conditions)<br>Sham Feedback Group<br>Random group assignment, single blind<br><b>Order of NFT Interventions<br/>(first Alpha, then Theta) not counterbalanced<br/>Only old participants, age &gt; 55 years</b> |
| 33*          | Ring<br>2015      | [71]     | Alpha-                         | 1   | 0 |   |   | Alpha NFT Group<br>Sham Feedback Group<br>Random group assignment, single-blind                                                                                                                                                                      |
| 34           | Rodrigues<br>2010 | [34]     | Alpha+                         | 1   |   |   | 1 | Alpha NFT Pilot Subjects<br><b>No Control Group</b><br><b>No information on blindfolding</b>                                                                                                                                                         |
| 35           | Ros<br>2009       | [72]     | Theta+/Alpha-                  | 1   | 1 |   |   | A/T NFT Group<br>SMR/Theta NFT Group<br><b>Waiting List Control Group</b><br>Random group assignment<br><b>No information on blindfolding</b>                                                                                                        |
| 36*          | Ros<br>2010       | [73]     | Alpha (Desyn-<br>chronization) | 1   | 0 |   |   | Alpha Desynchronization Group<br>Low Beta Synchronization Group<br>Random group assignment, single-blind                                                                                                                                             |



| First Author |                | Citation | Protocol      | EEG | G | A | M | Methodological Considerations                                                                                                                                          |
|--------------|----------------|----------|---------------|-----|---|---|---|------------------------------------------------------------------------------------------------------------------------------------------------------------------------|
| N°           | Year           |          |               |     |   |   |   |                                                                                                                                                                        |
| 37*          | Ros<br>2013    | [74]     | Alpha-        | 1   |   |   |   | Alpha NFT Group<br>Sham Feedback Group<br>Random group assignment, single-blind                                                                                        |
| 38           | Wei<br>2017    | [13]     | Alpha+        | 1   |   |   | 1 | Alpha NFT Group<br>Random Frequency NFT Group<br>Random group assignment, single-blind                                                                                 |
| 39           | Xiong<br>2014  | [75]     | Theta+/Alpha- | 1   |   |   | 1 | Theta-to-Alpha Ratio NFT Group<br>Behavioral Training Group<br>Sham Feedback Group<br>No-Intervention Control Group<br>Group assignment balanced for sex, single blind |
| 40           | Zoefel<br>2011 | [7]      | Alpha+        | 1   | 1 |   |   | Alpha NFT Group<br><b>No-Intervention Control Group</b><br><b>No information on group assignment</b><br><b>No information on blindfolding</b>                          |

201 Success/Failure scores for studies (references in the second column) that qualified for analysis. Training results: 1,  
202 training success; 0, training failure. “EEG” column lists the results on the modulation of EEG features, “Behaviour”  
203 column contains the list results in the behavioural domain, G, general effects of the training obtained in any of the  
204 investigated behaviours; A, attention; M, memory. Values in column G may also include effects not classified to  
205 attention (A) and memory (M) groups. The methodological considerations column gives information about the  
206 number of groups, interventions, random assignment and blindfolding. Abbreviations are defined as follows: SCP  
207 = Slow Cortical Potential, 0.5 – 2 Hz; Delta = 2 – 4 Hz; Theta = 4 – 7 Hz; Alpha also includes  $\mu$ -rhythm (9 – 11  
208 Hz) = 8 – 12 Hz; Beta also includes SMR (12 – 15 Hz) = 12 – 30 Hz; Gamma = 31 – 100 Hz. The studies vary with  
209 regard to the feedback direction (upwards/increment or downwards/decrement, marked as + or -) and its effect on  
210 different behavioural outcomes.

211

212 As can be observed in Table1, there is only one study using a methodologically sound experimental  
213 design with regard to a control intervention and blindfolding, which found a significant effect of alpha-  
214 up-training on memory [13]. Because of this apparent lack of evidence, this piece of research constitutes  
215 a replication study for the positive effect of alpha NFT on short-term memory performance while  
216 emphasizing the methodological aspects of the control group design and approaching the average  
217 consumer by using an easy in use and low-priced *Emotiv Epoc* EEG headset. That is why replications  
218 are needed to strengthen and better understand these initial findings.

#### 219 **1.4. The Present Study**

220 In the past years, considerable progress was made in the development of new EEG hard- and software:  
221 today, EEG systems are available which do not require conductive gel but use saline electrodes or  
222 operate with dry electrodes instead (e.g. *Quasar*, *Neurosky* or *Emotiv*). Along with this simplification  
223 of physiological measurements, EEG systems are becoming increasingly user-friendly and affordable.  
224 These new user-friendly and low-priced systems do not claim to compete with state of the art high-

225 priced EEG systems. However, they measure valid EEG signals [76,77] and have their own niche: the  
226 average consumer [78].

227 The study at hand combines the use of an easy to use and comparably low-priced EEG signal acquisition  
228 system (*Emotiv Epoc* EEG headset) with the question regarding the connection between alpha NFT and  
229 cognitive enhancement while adopting a methodologically sound experimental design. The following  
230 research question was formulated.

231 *Does individual upper alpha NFT with an easy in use, and comparably low priced Emotiv Epoc EEG*  
232 *headset enhance cognitive performance in reasonably healthy participants?*

233 In line with previous studies reporting increased individual upper alpha amplitude for NFT trainees (c.f.  
234 section 1.1 above), hypothesis H1 suggests that by means of IUA NFT, the relative IUA is enhanced.  
235 No such effect is observed in the sham feedback (SF) control group.

236 Referring to the results showing a significant increase in short-term memory performance after NFT  
237 (cf. section 1.2 above), hypothesis H2 suggests that alpha-NFT has a positive effect on short-term  
238 memory performance resulting in a greater increase in digit-span performance in the experimental  
239 group, compared to the control group.

240 In concordance with the theory of a connection between high alpha power during resting state and low  
241 alpha power during the execution of a mental task, so called event related desynchronization, hypothesis  
242 H3 is conjectured: There is an immediate positive effect of alpha-NFT on short-term memory  
243 performance. No such effect can be found in the SF control group.

## 244 **2. Materials and Method**

### 245 **2.1. Participants**

246 Thirty-three psychology students (26 female) were recruited at the *University of Fribourg* (Switzerland)  
247 via E-Mail and advertisement on the campus, ranging in age from 19 to 25 years ( $M = 21.27$  years,  $SD$   
248  $= 1.43$  years).

249 After being duly informed about the protocol of the study, all participants agreed to written informed  
250 consent authorized by the ethical committee of the *University of Fribourg*. As a compensation for their  
251 participation, they earned 5 credit points on a university-intern reward system. Participants were  
252 assigned randomly to either the experimental neurofeedback training group (NFT group,  $n_1 = 17$ ,  $M_{Age}$   
253  $= 21.29$ , 12 female) or the control sham feedback group (SF group,  $n_2 = 16$ ,  $M_{Age} = 21.13$ , 14 female).  
254 To assess whether subjects were aware of their condition, the last experimental task was to guess which  
255 group they were assigned to. The statement ‘I was assigned to the control group’ was answered on a 7-  
256 point Likert scale (ranging from ‘I strongly disagree’ to ‘I strongly agree’). Analysis of the data showed  
257 that NFT and SF group did not differ, which indicates that participants in either group were unaware of  
258 their status ( $M_{NFT} = 2.60$ ,  $SD_{P1} = 1.45$ ;  $M_{SF} = 3.18$ ,  $SD_{SF} = 0.33$ ;  $t(29) = 1.18$ ,  $p = .249$ ).

259

260

## 261 2.2. Experimental Protocol

262 In order to control for the influence of the circadian rhythm [12], each participant was scheduled to  
263 come to the laboratory at the same time-slot on 4 consecutive days (i.e. 4 sessions, e.g. from Monday  
264 to Friday always at 10 o'clock), see Fig 1.

265

266 INSERT FIG 1 HERE

267

268 **Fig 1. Procedure over four sessions.** Experimental procedure in experimental (Neurofeedback) and control (Sham  
269 Feedback) group over four sessions on four consecutive days.

270 A more detailed description of the experimental session undergone from session 1 (S1) to session 4 (S4)  
271 ensues. If not indicated differently, all of the following details apply for both, the experimental group  
272 (receiving NFT) and for the control group (receiving a sham feedback intervention).

273 After being equipped with the EEG headset, participants filled out the MDBF mood questionnaire [79]  
274 and a series of questionnaires concerning their daily physical activities and use of substances like  
275 caffeine, alcohol and cannabis, variables that have possible implications on alpha activity [80–82].  
276 Participants then performed a short-term memory test followed by two 2-min resting state EEG  
277 recording epochs, one with eyes closed and another with eyes open. These baseline recordings were  
278 used to assess the individual upper alpha peak for the NFT group (see next section for details).

279 NFT or Sham feedback (SF) started immediately after the baseline recordings and consisted of five 3-  
280 min periods with a 30 second break in-between. For S1, participants first received verbal and written  
281 information about alpha activity and were encouraged to be creative and come up with five personal  
282 strategies for the five periods of NFT (or SF). A list with five strategies (positive thinking, evoking  
283 emotions, visualizing activities, love and physiological calm) based on [5] was offered to participants  
284 who had difficulty coming up with their own ideas. Participants were asked to use only one strategy  
285 during each period, write it down during the break and to use every strategy only once over the course  
286 of the five periods. This procedure allowed to determine the most-successful alpha-enhancing strategy  
287 (one strategy, which produced the highest relative IUA for each participant). The participants were  
288 instructed to use their most successful strategy during the following sessions of S2 to S4.

289 At the end of each session, participants repeated the digit span test and the MDBF. For a schematic  
290 overview of the procedure during each of the sessions S1 to S4 see Fig 2.

291

292 INSERT FIG 2 HERE

293

294 **Fig 2. Procedure within sessions S1 to S4.** Procedure during each of the sessions S1 to S4 in experimental (NFT)  
295 and control (SF) group.

296

## 297 **2.3. Neurofeedback Training**

298 Feedback sites P7, O1, O2 and P8 were chosen for their connection to visual and attentional processes  
299 (see e.g. [83,84]). Using a simple channel spectra procedure in EEGLAB (*pop\_fourieeg*), each  
300 session's baseline recordings was analysed to determine the IUA frequency band, which was then  
301 used in that session. More specifically, the individual alpha peak (IAP) between 7.5 and 12.5 Hz [12]  
302 was assessed from the eyes closed resting condition and the lower and upper border of the IUA  
303 frequency band were defined as IAP and IAP + 2, respectively. We used the *Emotiv 3D Brain Activity*  
304 *Map* standalone software to provide IUA feedback with a colour spectrum ranging from grey (low  
305 IUA amplitude) over green to red (high IUA amplitude). During each session's period, participants  
306 watched their real-time IUA activity at occipital and parietal sites (P7, O1, O2, and P8) colour-coded  
307 on the surface of an animated head (see Fig 3) and were advised to produce as much red activity as  
308 possible. Participants in the experimental group performed IUA NFT always with a real-time IUA  
309 band feedback. The control group received SF by watching recordings of NFT sessions from another  
310 subject not included in this sample.

311 INSERT FIG 3 HERE

312 **Fig 3. Neurofeedback loop and EEG recording.**

313

## 314 **2.4. EEG Recording and Processing**

315 An *Emotiv Epoc* EEG headset was used for EEG baseline recordings and NFT. It has 14 channels (AF3,  
316 AF4, F7, F3, F4, F8, FC5, FC6, T7, T8, P7, P8, O1 and O2, international 10-20 system) and uses passive  
317 saline sensors. The device is wireless and transmits data via Bluetooth through the 2.4 GHz band, has a  
318 battery autonomy of 12 hours and uses a built-in amplifier, as well as a CMS-DRL circuit for the  
319 reduction of external electrical noise. It has a sampling rate of 128 bit/s, a bandwidth ranging from 0 to  
320 64 Hz, automatic digital notch filters at 50 Hz and 60 Hz and the dynamic range referred to the input is  
321 8400 $\mu$ V(pp). Moreover, a digital 5<sup>th</sup> order Sinc filter is built-in and impedance can be measured in real-  
322 time. EEG was recorded using the software *Emotiv TestBench*, ground-reference was M1 and sampling  
323 method was by default sequential sampling.

324 All analyses were carried out with MATLAB and EEGLAB [85]. The data was pre-processed using the  
325 following methods: re-referencing to channel M1, automatic removal of bad epochs using the command  
326 *pop\_autorej*, calculation of IC weights with the *runica* algorithm. Following [34], the relative alpha  
327 values for both, NFT and SF were calculated from the pre-processed EEG by dividing the mean  
328 amplitude of the IUA band (defined individually in the same way as in the NFT, between the IAP and  
329 IAP + 2 Hz) by the mean amplitude of the entire EEG bandwidth (Equation 1).

$$Relative\ Alpha = \frac{IndividualUpperAlphaAmplitude}{EEGAmplitude_{0.5 - 64\ Hz}} \quad (1)$$

330 This normalization was applied to avoid variability in the absolute amplitude between trials and sessions  
331 due to changes in impedance between electrodes and scalp. This way, attenuations caused by external  
332 factors that affect all frequency bands are mitigated. Furthermore, we worked with amplitude instead of  
333 power values to prevent excessive skewing and improve the validity of the statistical analysis [6].

## 334 2.5. Subjective and Objective Measures

335 Questions about physical activities, substance intake and sleep were assessed with a self-made  
336 questionnaire. Short-term memory performance was assessed by means of a forward digit span test  
337 taken from the PEBL test battery [86]. During this test, digits appeared on the screen and participants  
338 were advised to memorize them. On first trial, three digits appeared one after another and the participant  
339 typed them into an input field in the same order as they had appeared. In case of a correct answer, a  
340 positive feedback was given and the trial was repeated with the same number of digits. If the participant  
341 succeeded again, the number of digit was increased by one. The test continued until the participant typed  
342 in a wrong answer on two consecutive trials. Two performance indicators were assessed. One is the  
343 digit span itself, defined as the highest amount of digits the participants remembered correctly. Another  
344 measure is the total correct value, representing the total number of correct answers. For example, a digit  
345 span of 9 indicates that the participant was able to remember 9 digits correctly. The total correct value  
346 in this example however can vary between 7 and 16 because participants were allowed to continue with  
347 the test if they made an error in one trial (e.g. they remembered 8 digits only once). In the statistical  
348 analysis of the present study, only total correct values are reported.

## 349 2.6. Statistical Analyses

350 All analyses were carried out with the IBM Statistical Package for Social Sciences (SPSS version 24)  
351 and R [87]. If not indicated differently, the chosen level of significance for all analyses was  $\alpha = .05$   
352 (5%). Data were analysed with several mixed-measures design ANOVAs and corresponding contrast  
353 analyses using either a *polynomial* or a *simple* algorithm. Concerning the mixed design ANOVAs,  
354 *Mauchly's Test of Sphericity* was taken into account. If *Mauchly's Test* was not significant ( $p \geq .20$ ),  
355 sphericity was assumed. When *Mauchly's Test* was significant ( $p < .20$ ) and *Greenhouse-Geisser*  
356 *Epsilon* was smaller than .75, *Greenhouse-Geisser* corrected results were reported. When *Mauchly's*  
357 *Test* was significant ( $p < .20$ ) and *Greenhouse-Geisser Epsilon* was larger than .75, *Huynh-Feldt*  
358 corrected results were reported.

359 The general connection between alpha and digit-span was assessed with linear regressions.  
360 Additionally, for a more detailed picture, paired-samples *t*-tests with Bonferroni adjustment were  
361 conducted. More specifically, during each analysis (e.g. the 20x2 mixed designs ANOVA), Bonferroni  
362 correction was applied by multiplying the *p*-value of all associated *t*-tests by the number performed *t*-  
363 tests.

364 For the present study, only the change of alpha and digit-span and not their general level was of interest.  
365 Hence, all alpha measurements were standardized by subtracting the mean value of the first  
366 measurement. By applying this standardisation to experimental group and control group separately, it  
367 was assured both groups had the same initial value of alpha and digit-span, respectively. Digit-span  
368 values were not standardized because they did not differ during the first measurement ( $M_{\text{NFT}} = 8.76$ ,  
369  $SD_{\text{NFT}} = 1.82$ ;  $M_{\text{SF}} = 7.94$ ,  $SD_{\text{SF}} = 1.81$ ;  $t(31) = 1.31$ ,  $p = .20$ ).

### 370 2.6.1. Complementary analyses for selected extraneous variables

371 *Session related changes in mood.* Thirteen extraneous variables related to mood and effort were  
372 collected before and after each experimental session (see Figure 7B for details). We computed session

373 related changes for each one of these variables and used principal component analysis (PCA) for feature  
374 extraction. The number of principal components (PCs) was chosen by interpreting the scree plot, and  
375 choosing the number of components until when diminishing returns would be obtained, guaranteed that  
376 at least 60% of variance could be explained. Each PC was then used as the response variable of a linear  
377 mixed effects model, resulting in one linear model for each PC. Each model had two random variables:  
378 subject as the random intercept and session number as the random slope. The fixed effect term was a  
379 triple interaction between period, experimental group and changes in relative alpha. Changes in relative  
380 alpha at each period were computed using an area under the curve with respect to increase (AUCi)  
381 formula described in [88], and these values were averaged for each session. Satterthwaite approximation  
382 for the degrees of freedom was used to compute  $p$ -values with the *lmerTest* package in the R  
383 programming environment [89].

384 *Analysis of the extraneous variable pre-session relaxation.* Here, we aimed at investigating if the  
385 inclusion of pre-session relaxation increases the predictive validity of the experimental group in changes  
386 for relative alpha for each session. A mixed effects model was used to predict the session average  
387 relative alpha AUCi, using each subject as the random intercept and session number as the random  
388 slope. The fixed effect term was the moderation between experimental group and pre-session relaxation.  
389 The moderation was introduced to understand if pre-session relaxation increases in alpha would be  
390 specific to one of the experimental groups. If the interaction term was not significant, we would test the  
391 additive model. For the latter, pre-session alpha would be tested as a suppressor variable. Satterthwaite  
392 approximation for the degrees of freedom was used to compute  $p$ -values with the *lmerTest* package in  
393 the R programming environment.

### 394 3. Results

#### 395 3.1. Alpha

396 Regarding the temporal development of individual upper alpha (Fig 4), visual inspection of the data  
397 indicates that both groups increased in alpha. However, this impression was not confirmed by the results  
398 of a mixed measures design  $20 \times 2$ ,  $\text{TIME}_\alpha \times \text{GROUP}$  ANOVA ( $F(5.24, 162.36) = 1.79, p = .114, \eta_p^2 =$   
399  $.06$ ). Moreover, neither the interaction  $\text{TIME}_\alpha \times \text{GROUP}$ ,  $F(5.24, 162.36) = 0.58, p = .363, \eta_p^2 = .02$  nor  
400 the effect of GROUP were significant,  $F(1, 31) = 0.10, p = .757, \eta_p^2 = .00$

401 INSERT FIG 4 HERE

402 **Fig 4. Temporal Development of Individual Upper Alpha.** Temporal development of relative individual upper  
403 alpha over twenty 3-min periods of Neurofeedback Training (NFT, blue line) and sham feedback (SF, orange  
404 dashed line) during the four test sessions on four consecutive days. Relative alpha was obtained by dividing the  
405 average amplitude of the individual upper alpha band (around 10 to 13.5 Hz) by the average amplitude of the entire  
406 EEG band (i.e. 0.5 to 64 Hz). Moreover, relative alpha values was standardized with the first measurement (i.e.  
407 period 1). Error bars indicate standard error of the mean (*SEM*).

408 However, Fig 4 shows stronger increase between P1 and P20 for the NFT group compared to the SF  
409 group.  $T$ -tests with Bonferroni adjustment showed significant differences from P1 to P20 for the  
410 experimental group ( $M_{P1} = 0.00, SD_{P1} = 0.34; M_{P20} = 0.36, SD_{P20} = 0.66$ ),  $t(16) = 2.63, p = .018$ , but not  
411 for the control group ( $M_{P1} = 0.00, SD_{P1} = 0.74; M_{P20} = 0.27, SD_{P20} = 0.88$ ),  $t(15) = 1.33, p = .204$ .

412 Applying *contrast* analysis (simple), the first significant amplitude difference in the SF group appeared  
413 between P1 and P11,  $F(1, 15) = 5.08, p = .04, \eta_p^2 = .25$ . The NFT group showed its first significant  
414 differences already between measurements P1 and P3,  $F(1, 16) = 12.67, p = .003, \eta_p^2 = .44$ . Contrast  
415 analyses indicate hence a faster increase of relative alpha in the NFT group.

416 Moreover, in the experimental group *t*-tests with Bonferroni adjustment showed significant  
417 improvements from P1 ( $M_{P1} = 0.00, SD_{P1} = 0.34$ ) to P3 ( $M_{P3} = 0.29, SD_{P3} = 0.48$ ),  $t(16) = 3.56, p = .006$ ,  
418 and from P1 to P5 ( $M_{P5} = 0.30, SD_{P5} = 0.49$ ),  $t(16) = 3.69, p = .004$ . The significant increase in alpha  
419 from P1 to P3 and from P1 to P5 could not be observed in the control group ( $M_{P1} = 0.00, SD_{P1} = 0.74$ ;  
420  $M_{P3} = 0.03, SD_{P3} = 0.56$ ;  $M_{P5} = 0.18, SD_{P5} = 0.73$ ),  $t(15) = 0.28, p = 1$ ;  $t(15) = 1.08, p = .594$ ,  
421 indicating a faster increase in relative alpha in the NFT group as well.

422 Interestingly, regardless of group and on an exploratory note, a significant positive correlation between  
423 the unstandardized initial relative alpha (P1) and the alpha improvement during the course of the  
424 experiment (P20 minus P1) was observed,  $r(31) = .44, p = .011$ . This finding was supported when the  
425 same analysis was performed on the level of test days (sessions). The initial relative alpha during the  
426 first Period (S1) correlated with the mean improvement over the course of the experiment (S4),  $r(31) =$   
427  $.52, p = .002$ . In other words, participants who exhibited a high relative alpha in the beginning of the  
428 experiment had a higher gain in alpha during the training compared to participants who started with a  
429 low alpha level.

430 The findings examined so far are partially in concordance with hypothesis H1, stating a positive effect  
431 of NFT on relative IUA. The IUA increase in the experimental group is observed earlier and the  
432 difference between P1 and P20 shows significance only in the NFT group. Interestingly and contrary to  
433 our expectation, alpha enhancement could be observed in the control group as well, when contrast  
434 analyses are taken into consideration.

435

### 436 **3.2. Neurofeedback Training and Short-Term Memory Performance**

437 Regarding the temporal development of STM performance, a significant main effect of  $TIME_{STM}$  was  
438 observed,  $F(7, 217) = 4.90, p < .001, \eta_p^2 = .14$ , but the interaction  $TIME_{STM} * GROUP$  did not reach  
439 significance level,  $F(7, 217) = 1.24, p = .280, \eta_p^2 = .04$ . No effect of factor GROUP was observed,  $F(1,$   
440  $31) < 0.01, p = .963, \eta_p^2 < .01$ . Contrasts showed a linear trend of  $TIME_{STM}$  with  $F(1, 31) = 6.36, p =$   
441  $.017, \eta_p^2 = .17$ . No linear trend of the interaction  $TIME_{STM} * GROUP$  was observed  $F(1, 31) = 0.02, p =$   
442  $.887, \eta_p^2 < .01$ .

443 Paired-samples *t*-tests with Bonferroni adjustment revealed no significant differences between first and  
444 last measurement of STM in the experimental group ( $M_{T1} = 8.77, SD_{T1} = 1.82$ ;  $M_{T8} = 10.06, SD_{T9} =$   
445  $2.49$ ),  $t(16) = 1.85, p = .083$ , but for the control group ( $M_{T1} = 7.94, SD_{T1} = 1.81$ ;  $M_{T8} = 9.69, SD_{T8} =$   
446  $1.96$ ),  $t(15) = 2.78, p = .014$ . All results examined in this section contradict hypothesis H2 postulating  
447 a general effect of NFT on STM.

448 INSERT FIG 5 HERE

449 **Fig 5. Temporal development of STM performance.** Temporal development of short-term memory (digit-span)  
450 performance over 8 tests (T1 to T8) in a neurofeedback (NFT, blue line) and a sham feedback (SF, orange dashed  
451 line) group. Subjects participated in four consecutive test days (S1-S4) containing two tests each. Uneven test  
452 numbers (T1, T3, T5 and T7) were conducted before the intervention (NFT or SF), even test number (T2, T4, T6  
453 and T8) were conducted after the intervention. Error bars indicate *SEM*.

454 To evaluate the immediate effect of NFT on STM performance, a 2\*2 mixed-model ANOVA with the  
455 within factor PRE/POST and the between-groups factor GROUP was conducted. Factor PRE/POST had  
456 two levels: averaged digit span performance values conducted *before* the intervention vs. averaged digit  
457 span performance values conducted *after* the intervention (see Fig 7). Participants did not improve in  
458 STM performance during NFT/SF,  $F(1, 31) = 2.98, p = .094, \eta_p^2 = .09$ . Test of within subjects effects  
459 did not reveal an interaction effect,  $F(1, 31) = 1.26, p = .271, \eta_p^2 = .04$ . No effect of GROUP was  
460 observed,  $F(1, 31) = 0.02, p = .907, \eta_p^2 < .01$ .

461 These findings do not support hypothesis H3 postulating an immediate positive effect of NFT on STM.

462 INSERT FIG 6 HERE

463 **Fig 6. STM performance before vs. after the intervention.** Short-term memory performance, measured by digit-  
464 span tests *before* and *after* neurofeedback training (NFT, blue line) and sham feedback (SF, orange dashed line).  
465 Error bars indicate *SEM*.

### 466 **3.3. Alpha and Short-Term Memory**

467 To assess the connection between alpha and STM, a multiple regression analysis was conducted. The  
468 dependent variable was STM improvement defined as performance delta-value of test 8 (T8) minus test  
469 1 (T1). Relative alpha values were averaged over sessions (see upper-left corner Fig 4) and served as  
470 predictors. Explained variance  $R^2$  was 0.10 and the corresponding ANOVA was not significant,  
471  $F(4, 32) = 0.79, p = .540$ . This finding contradicts hypothesis H2, assuming a general connection  
472 between alpha and STM performance

473

### 474 **3.4. Analyses for selected extraneous variables**

#### 475 **3.4.1. Session related changes in mood**

476 In order to infer how NFT affected mood changes during the experiment, we calculated the differences  
477 in mood from the beginning to the end of each session. We also calculated total amount of change in  
478 relative alpha at each period using an area under the curve with respect to increase (AUCi) formula  
479 described in [88]. The 12 mood change variables, and one variable representing effort, were compressed  
480 using principle component analysis (PCA) into 5 principal components (PCs) explaining 60.2% of the  
481 variability in the original variables (See Fig 7A). *Varimax* rotation was used to facilitate interpretation  
482 of each PC, resulting in the loading matrix in Fig 7B. Each PC was used as the response variable in a  
483 linear mixed effects model (see Figure 7C for the model with PC5 as the response variable) with each  
484 subject as the random intercept, session number as the random slope and a triple interaction between  
485 period, experimental group and relative alpha AUCi. The only PC with a significant ( $p = 0.030$ , however  
486 when applying Bonferroni correction for 5 comparisons  $p_{corrected} = 0.152$ ) triple interaction predictor was



487 PC5, a component that loads positively on the variable changes in the bad mood (positive values of PC5  
488 represent an increase in bad mood). This model had a total explanatory power (conditional  $R^2$ ) of  
489 48.06%. The triple interaction between session, relative alpha AUCi and experimental group (see Figure  
490 7C;  $\beta = 0.30$ ,  $SE = 0.14$ , 95% CI [0.035, 0.57],  $t(105) = 2.20$ ,  $p = .030$ ,  $p_{corrected} = 0.152$ ) could be  
491 considered a small effect (std.  $\beta = 0.33$ , std.  $SE = 0.15$ ). Simple main effects for each experimental  
492 group were analyzed in order to evaluate whether the interaction of session and relative alpha AUCi  
493 was significant only for the NFT group (after correcting for these two comparisons). For this group, the  
494 interaction effect between Session and relative alpha AUCi was significant ( $\beta = -0.30$ ,  $SE = 0.12$ , 95%  
495 CI [-0.53, -0.070],  $t(52) = -2.56$ ,  $p = .014$ ,  $p_{corrected} = 0.028$ ) and could be considered as small (std.  $\beta = -$   
496 0.25, std.  $SE = 0.097$ ). Since no effects were found for the control group ( $p = 0.997$ ,  $p_{corrected} = 1$ ), these  
497 results suggest that in the NFT group, learning to progressively increase the relative alpha band lead to  
498 small but significant reductions in bad mood.

### 499 3.4.2 Analysis of the extraneous variable pre-session relaxation

500 One hypothesis to explain the similar alpha production between the NFT and control group is, that  
501 participants in the control group, although not receiving real feedback, were also trying relaxation  
502 strategies (since this was one of the cognitive strategies recommended to participants). Therefore, we  
503 decided to investigate if the experimental group variable would be capable to predict higher relative  
504 alpha AUCi values in the NFT group by accounting for the moderation between experimental group  
505 and pre-session relaxation. Fitting the model described in Figure 8 to the data, the effect of experimental  
506 Group was significant ( $\beta = -1.89$ ,  $SE = 0.72$ , 95% CI [-3.30, -0.47],  $t(94) = -2.63$ ,  $p < .010$ ) and could  
507 be considered small (std.  $\beta = -0.20$ , std.  $SE = 0.17$ ). The negative value of the estimated coefficient  
508 points to a lower overall relative alpha AUCi for the control Group. The effect of the interaction between  
509 level of relaxation at the beginning of the session and experimental Group ( $\beta = 0.47$ ,  $SE = 0.19$ , 95%  
510 CI [0.088, 0.84],  $t(99) = 2.45$ ,  $p = .016$ ) and could be considered small (std.  $\beta = 0.44$ , std.  $SE = 0.18$ ).  
511 This indicates either the NFT or the control group could show an effect of level of relaxation on the  
512 production of relative alpha. A post hoc analysis revealed that this is not true for the NFT group: The  
513 effect of being relaxed was not significant ( $\beta = -0.19$ ,  $SE = 0.11$ ,  $t(37) = -1.63$ ,  $p = .112$ ). For the control  
514 group there was a trend for being relaxed leading to more relative alpha increases ( $\beta = 0.28$ ,  $SE = 0.15$ ,  
515 95% CI [-0.029, 0.58],  $t(53) = 1.87$ ,  $p = 0.068$ ) and the effect could be considered small (std.  $\beta = 0.23$ ,  
516 std.  $SE = 0.12$ ). These results suggest that if the level of relaxation before each Session is taken into  
517 consideration, then it is possible to observe an overall effect of NFT on the production of relative alpha.  
518 It also suggests that for the control group, being relaxed might have been what lead to increases in  
519 relative alpha.

520 INSERT FIG 7 HERE

521 **Fig 7. Effects of NFT training on mood change.** A) Percentage of variance explained for each PC. The 5 PCs  
522 used result in a total of 60.2% of variance explained (dark-shaded bars). B) Loading matrix for each PC after  
523 Varimax rotation. Loadings smaller than 0.4 are not shown. C) Linear mixed effect model for PC5 as the response  
524 variable and the triple interaction between session, relative alpha AUCi and experimental group as predictors. D)  
525 Simple effects model for the NFT group. E) Simple effects model for the control group. For panels C), D) and E)  
526 coefficient estimates and standard errors (SE) depicted as dot and line respectively. Red and blue colors represent  
527 positive and negative coefficient estimates, respectively. Significance levels: \*\*  $p < .01$ , \*  $p < .05$ . Significance

528 levels are presented for uncorrected  $p$ -values. When Bonferroni correction is applied, to control for Type I errors  
529 due to the comparing models for five PCs, the triple interaction term in panel C is no longer significant ( $p_{\text{corrected}} =$   
530 0.152). For panels D and E, when applied, Bonferroni correction controls for two comparisons made in the simple  
531 main effects analysis resulting in a significant interaction effect 'Session x relative alpha' AUCi ( $p_{\text{corrected}} = 0.028$ ).

532 INSERT FIG 8 HERE

533 **Fig 8.** Linear mixed effect model for relative alpha AUCi as the response variable and the interaction between how  
534 relaxed participants were at the beginning of the Session and experimental group as predictors. Coefficient  
535 estimates and standard errors (SE) depicted as dot and line respectively. Red and blue colors represent positive and  
536 negative coefficient estimates, respectively. Significance levels: \*\*  $p < .01$ , \*  $p < .05$ .

#### 537 **4. Discussion**

538 The present study investigated the connection between IUA alpha NFT, relative alpha and short-term  
539 memory performance using a commercially available BCI device (*Emotiv Epoc*) in a single-blind  
540 design. In line with previous results [5], an enhancing effect of the training on the relative alpha and on  
541 short-term memory performance (*digit-span Task*) was expected.

542 Our analyses showed a significant improvement in relative alpha in the neurofeedback group between  
543 period 1 and period 20 which could not be observed in the sham feedback group. Moreover, contrasts  
544 showed that the increase in alpha was obtained much earlier (period 3) for participants who saw their  
545 real-time brain activity compared to participants who followed a sham-feedback intervention (period  
546 11). Additionally, we also observed that if the level of relaxation before each Session is taken into  
547 account, it is possible to observe a clear effect of NFT on the production of relative alpha. All in all, the  
548 results regarding relative alpha indicate that up-training alpha with a real-time NFT procedure facilitates  
549 the process of enhancing alpha activity. Thus, the results of the present study were in accordance with  
550 hypothesis H1.

551 Furthermore, we hypothesised the control group would not show an enhancement in alpha activity.  
552 Interestingly though, contrast analyses showed the opposite was true and mixed measure longitudinal  
553 analysis indicated that the slope for both groups were equal. One possible explanation for this finding  
554 is that the control group was given feedback during the first session. Although sham feedback was used  
555 for this group, by the end of this session they were informed of the most successful mental strategies  
556 for alpha upregulation. This would imply that it is possible to infer appropriate mental strategies within  
557 one session and that coherent visual feedback might not be necessary for ensuing sessions to upregulate  
558 alpha to a certain degree, provided the adequate mental strategy is used. This interpretation seems to  
559 be in line with studies showing an alpha enhancing effect of certain types of meditation (e.g. [48–50]).  
560 A replication study with an additional control group that would not be informed about which strategies  
561 are generally linked to alpha enhancement might address this question. Another possible explanation  
562 resides in the framework of socio-physiological processes. Alpha is enhanced by being in a calm and  
563 resting state and in the course of the current study, participants became more and more familiar with the  
564 experimental environment, as well as with the experimenter. It is likely that the participants became  
565 more and more relaxed, comfortable and calm during the later sessions of NFT/SF, which might have  
566 led to the observed enhanced level of alpha in the control group. This interpretation finds some support  
567 in the analysis of extraneous variables, which suggests that being relaxed is an important factor for

568 increases in relative alpha. In line with [93] it could be important to collect data from a control group  
569 advised with an inverse NFT paradigm.

570 No general connection between alpha and STM performance was observed in this study and thus, no  
571 evidence supported hypothesis H2. There was indeed a significant effect of time throughout the eight  
572 digit-span tests but no main or interaction effects due to NFT. There was also no immediate positive  
573 effect of NFT on STM performance. All in all, these findings contradicted our hypotheses and several  
574 explanations can be put forward.

575 For one, the quick improvement in the digit-span task observed in most participants is most likely due  
576 to practice and it seemed to be stronger than the more subtle positive impact of higher alpha amplitude.  
577 Electrode placement could also be responsible for the lack of effect of NFT on STM performance.  
578 Feedback signals were acquired from P7, O1, O2 and P8 because the occipital cortex is involved in  
579 every visual process and parietal sites are connected to attention (e.g. [45]). It is possible though, that  
580 the choice of electrodes influenced or impaired the effect of the NFT on STM performance. Many  
581 authors use electrode sites like Cz, Pz, Fz and C3 which differ from the sites used during the current  
582 study (see e.g. [9,13,51,52]). However parietal and occipital electrode sites are used commonly for IUA  
583 NFT as well (e.g. [10,36,53]). Finally, the possibility of the absence of an effect of IUA NFT on STM  
584 performance should be considered. Previous studies where this effect was reported have used no-  
585 intervention or waiting-list control groups (e.g. [5,10]), which deserve critical attention. Neither have  
586 they ruled out the expectancy effect on the side of the participants (placebo or Hawthorne effect, [94]),  
587 nor did such designs compensate for a potential experimenter bias. In the few studies using randomized  
588 sham feedback control groups, no significant results indicating an effect of alpha feedback on STM  
589 performance could be reported [60,95]. All these observations are in accordance with the review of  
590 Rogala [45], which excluded many alpha NFT studies for methodological considerations and could rate  
591 only one study [70] as success in regard of the effect of NFT on memory (i.e. *digit-span task*).

592 Nevertheless, some limitations in this study need to be pointed out which could have obfuscated this  
593 effect. Although it is used in various clinical test batteries and generally is considered a useful indicator  
594 for cognitive performance [96], the digit-span task used in this study showed rather low intra-individual  
595 variation and strong learning effects in the repeated measures design. Therefore, a different measure for  
596 cognitive performance (e.g. Mental Rotation Task, N-Back or a Trail Making Test) might have led to  
597 larger variances without concealing a potential NFT effect by learning.

598 It is also possible, that the conditioning paradigm was not efficient enough due to using a simple colour-  
599 code as feedback signal. Other authors worked with very specific reward symbols and sounds (e.g.  
600 beeps, counters, pleasant sounds or even applause, [25,48,50]). Future implementations should  
601 guarantee that NFT is done in an immersive environment with clear and intuitive rewards. This is  
602 particularly important in the perspective of NFT with commercially available devices since they most  
603 probably will be used outside controlled laboratory settings.

604 Finally, the study also has some limiting aspects regarding how mental strategies were employed to  
605 enhance individual upper alpha activity. Participants were asked to maintain the same strategy after the  
606 first training session. Interestingly, the corresponding gain in alpha activity on the first day was very  
607 high compared not only to the first measurement of NFT but also compared to the rest of the training

608 course. In period 5 (P5), participants in the NFT group reached nearly the same relative alpha ( $M_{IUA,P5}$   
609  $= 0.30$ ,  $SD_{IUA,P5} = 0.49$ ) as in the last period, P20 ( $M_{IUA,P20} = 0.36$ ,  $SD_{IUA,P20} = 0.66$ ). Perhaps, choosing  
610 one successful strategy for alpha enhancement is not as effective as advising the participants “to be  
611 guided by the feedback process” itself [56] or to interchange between more than one strategies in order  
612 to avoid fatigue or, the effect of alpha NFT plateaus in general after a certain amount of training like  
613 Dekker states [54].

614 One of the main motivations for this study was to assess if a commercially available EEG device could  
615 offer the necessary means to achieve EEG self-regulation and, in turn, reap its benefits in cognitive  
616 improvement. We think this is an important question to answer given the promising benefits of NFT on  
617 mental health and well-being, its non-invasiveness, and the growing affordability of commercial EEG  
618 devices; NFT is no longer just important in the clinical setting, but also in real-life settings. Although  
619 our hypotheses for cognitive improvement were not verified, we observed promising results in our  
620 experimental group concerning alpha upregulation: this group achieved significant alpha increases  
621 faster and these increases were associated with decreases in negative mood. We expect this study to be  
622 a stepping stone in larger collection of works that aim for ecological validity and sound experimental  
623 design. Ultimately, it will be possible to collect data from a large number of participants following NFT  
624 at their homes, workplaces or any place of their choosing so, it is urgent to start defining appropriate  
625 protocols. While the NFT implementation of the present study might not be suitable for the daily use,  
626 NFT harbours great potential, especially, in our opinion, when combined with gamification strategies.  
627 This way, the enhancing effect of NFT could be combined with the immanent beneficial effect of  
628 computer games (see e.g. [57]) and immersive virtual environments. Future research should not only  
629 focus on theoretical aspects of the working mechanism behind NFT, but on the development of engaging  
630 NFT implementations with practical relevance.

631

## 632 5. References

- 633 1. Greely H, Sahakian B, Harris J, Kessler RC, Gazzaniga M, Campbell P, et al. Towards  
634 responsible use of cognitive-enhancing drugs by the healthy. *Nature*. 2008;456: 702–705.  
635 doi:10.1038/456702a
- 636 2. Husain M, Mehta MA. Cognitive enhancement by drugs in health and disease. *Trends Cogn*  
637 *Sci*. Elsevier Ltd; 2011;15: 28–36. doi:10.1016/j.tics.2010.11.002
- 638 3. Maher B. Poll results: look who’s doping. *Nat Publ Gr*. 2010;452: 674–675.  
639 doi:10.1038/452674a
- 640 4. Fanelli D. Do pressures to publish increase scientists’ bias? An empirical support from US states  
641 data. *PLoS One*. 2010;5. doi:10.1371/journal.pone.0010271
- 642 5. Nan W, Rodrigues JP, Ma J, Qu X, Wan F, Mak PI, et al. Individual alpha neurofeedback  
643 training effect on short term memory. *Int J Psychophysiol*. Elsevier B.V.; 2012;86: 83–87.  
644 doi:10.1016/j.ijpsycho.2012.07.182
- 645 6. Eegner T, Sterman MB. Neurofeedback treatment of epilepsy: from basic rationale to practical

- 646 application. *Expert Rev Neurother.* 2006;6: 247–257. doi:10.1586/14737175.6.2.247
- 647 7. Zoefel B, Huster RJ, Herrmann CS. Neurofeedback training of the upper alpha frequency band  
648 in EEG improves cognitive performance. *Neuroimage.* Elsevier Inc.; 2011;54: 1427–1431.  
649 doi:10.1016/j.neuroimage.2010.08.078
- 650 8. Egner T, Strawson E, Gruzelier JH. EEG signature and phenomenology of alpha/theta  
651 neurofeedback training versus mock feedback. *Appl Psychophysiol Biofeedback.* 2002;27:  
652 261–270. doi:10.1023/A:1021063416558
- 653 9. Nan W, Rodrigues JP, Wan F, Mak PU, Mak PI, Vai MI, et al. A Further Study on Short Term  
654 Memory Improvement by Neurofeedback. 2012 Int Conf Biomed Eng Biotechnol. 2012; 959–  
655 961. doi:10.1109/iCBEB.2012.25
- 656 10. Reis J, Portugal A, Pereira MR, Dias N. Alpha and theta intensive neurofeedback protocol for  
657 age-related cognitive deficits. *Int IEEE/EMBS Conf Neural Eng NER.* 2015;2015–July: 715–  
658 718. doi:10.1109/NER.2015.7146723
- 659 11. Klimesch W. EEG-alpha rhythms and memory processes. *Int J Psychophysiol.* 1997;26: 319–  
660 340. doi:10.1016/S0167-8760(97)00773-3
- 661 12. Klimesch W. EEG alpha and theta oscillations reflect cognitive and memory performance: A  
662 review and analysis. *Brain Res Rev.* Netherlands: Elsevier Science; 1999;29: 169–195.  
663 doi:10.1016/S0165-0173(98)00056-3
- 664 13. Wei TY, Chang DW, Liu Y De, Liu CW, Young CP, Liang SF, et al. Portable wireless  
665 neurofeedback system of EEG alpha rhythm enhances memory. *Biomed Eng Online.* BioMed  
666 Central; 2017;16: 1–18. doi:10.1186/s12938-017-0418-8
- 667 14. Arns M, Heinrich H, Strehl U. Evaluation of neurofeedback in ADHD: The long and winding  
668 road. *Biol Psychol.* Elsevier B.V.; 2014;95: 108–115. doi:10.1016/j.biopsycho.2013.11.013
- 669 15. Cannon R. Editorial Perspective: Defining neurofeedback and its functional processes.  
670 *NeuroRegulation.* 2015;2: 60–69. doi:10.15540/nr.2.2.60
- 671 16. Hammond DC. What is Neurofeedback: An Update. *J Neurother.* 2011;15: 305–336.  
672 doi:10.1080/10874208.2011.623090
- 673 17. Tan G, Thornby J, Hammond DC, Strehl U, Canady B, Arnemann K, et al. A meta analysis of  
674 EEG biofeedback in treatment of epilepsy. *Clin EEG Neurosci.* 2009;40: 1–8.  
675 doi:10.1177/155005940904000310
- 676 18. Linden M, Habib T, Radojevic V. A controlled study of the effects of EEG biofeedback on  
677 cognition and behavior of children with attention deficit disorder and learning disabilities 1.  
678 Biofeedback Self-Regulation (previous name), *Appl Psychophysiol Biofeedback J* (new name).  
679 1996;21: 35–49. doi:10.1007/BF02214148
- 680 19. Lutzenberger W, Gruzelier H, Fuchs T, Birbaumer N, Lutzenberger W, Gruzelier JH, et al.  
681 Neurofeedback Treatment for Attention-Deficit/ Hyperactivity Disorder in Children: A

- 682 Comparison With Methylphenidate. *Appl Psychophysiol Biofeedback*. 2003;28: 1–12.  
683 doi:10.1023/A:1022353731579
- 684 20. Gevensleben H, Holl B, Albrecht B, Vogel C, Schlamp D, Kratz O, et al. Is neurofeedback an  
685 efficacious treatment for ADHD? A randomised controlled clinical trial. *J Child Psychol*  
686 *Psychiatry Allied Discip*. 2009;50: 780–789. doi:10.1111/j.1469-7610.2008.02033.x
- 687 21. Gevensleben H, Holl B, Albrecht B, Schlamp D, Kratz O, Studer P, et al. Distinct EEG effects  
688 related to neurofeedback training in children with ADHD: A randomized controlled trial. *Int J*  
689 *Psychophysiol*. Elsevier B.V.; 2009;74: 149–157. doi:10.1016/j.ijpsycho.2009.08.005
- 690 22. Kouijzer MEJ, van Schie HT, de Moor JMH, Gerrits BJJ, Buitelaar JK. Neurofeedback  
691 treatment in autism. Preliminary findings in behavioral, cognitive, and neurophysiological  
692 functioning. *Res Autism Spectr Disord*. Elsevier Ltd; 2010;4: 386–399.  
693 doi:10.1016/j.rasd.2009.10.007
- 694 23. Coben R, Linden M, Myers TE. Neurofeedback for Autistic spectrum disorder: A review of the  
695 literature. *Appl Psychophysiol Biofeedback*. NY: Springer; 2010;35: 83–105.  
696 doi:10.1007/s10484-009-9117-y
- 697 24. Thompson L, Thompson M, Reid A. Neurofeedback outcomes in clients with Asperger’s  
698 Syndrome. *Appl Psychophysiol Biofeedback*. 2010;35: 63–81. doi:10.1007/s10484-009-9120-  
699 3
- 700 25. Sokhadze EM, Trudeau DL, Cannon RL. Treating Addiction Disorders. *Clinical Neurotherapy:*  
701 *Application of Techniques for Treatment*. 2013. doi:10.1016/B978-0-12-396988-0.00011-8
- 702 26. Sokhadze TM, Cannon RL, Trudeau DL. EEG biofeedback as a treatment for substance use  
703 disorders: review, rating of efficacy, and recommendations for further research. *Appl*  
704 *Psychophysiol Biofeedback*. 2008;33: 1–28. doi:10.1007/s10484-007-9047-5
- 705 27. Sterman MB, Egner T. Foundation and practice of neurofeedback for the treatment of epilepsy.  
706 *Appl Psychophysiol Biofeedback*. 2006;31: 21–35. doi:10.1007/s10484-006-9002-x
- 707 28. Sterman BM. Basic Concepts and Clinical Findings in the Treatment of Seizure Disorders with  
708 EEG Operant Conditioning. *Clin Electroencephalogr*. 2000;31: 45–55.  
709 doi:10.1177/155005940003100111
- 710 29. Kerson C, Sherman R a., Kozlowski GP. Alpha Suppression and Symmetry Training for  
711 Generalized Anxiety Symptoms. *J Neurother*. 2009;13: 146–155.  
712 doi:10.1080/10874200903107405
- 713 30. Luijmes RE, Pouwels S, Boonman J. The effectiveness of neurofeedback on cognitive  
714 functioning in patients with Alzheimer’s disease: Preliminary results. *Neurophysiol Clin*.  
715 Elsevier Masson SAS; 2016;46: 1–21. doi:10.1016/j.neucli.2016.05.069
- 716 31. Birbaumer N. slow Cortical Potentials: Plasticity, Operant Control, and Behavioral Effects.  
717 *Neurosci*. 1999;5: 74–78. doi:10.1177/107385849900500211

- 718 32. Linden M, Habib T, Radojevic V. A controlled study of the effects of EEG biofeedback on  
719 cognition and behavior of children with attention deficit disorder and learning disabilities. *Appl*  
720 *Psychophysiol Biofeedback J.* 1996;21: 35–49. doi:10.1007/BF02214148
- 721 33. Klimesch W, Sauseng P, Gerloff C. Enhancing cognitive performance with repetitive  
722 transcranial magnetic stimulation at human individual alpha frequency. *Eur J Neurosci.*  
723 2003;17: 1129–1133. doi:10.1046/j.1460-9568.2003.02517.x
- 724 34. Rodrigues JP, Migotina DG, Rosa AC. EEG training platform : Improving Brain- Computer  
725 Interaction and Cognitive Skills. 2010; 425–429.
- 726 35. Hagemann D. Das Elektroencephalogramm (EEG) und seine quantitative Analyse. Tonische  
727 Asymmetrien corticaler Akt und affektive Dispos Eine empirische Untersuchung latenter State-  
728 und Trait. 1999; 19–63.
- 729 36. Gruzelier JH. EEG-neurofeedback for optimising performance. I: A review of cognitive and  
730 affective outcome in healthy participants. *Neurosci Biobehav Rev.* Elsevier Ltd; 2014;44: 124–  
731 141. doi:10.1016/j.neubiorev.2013.09.015
- 732 37. Angelakis E, Lubar JF, Stathopoulou S. Electroencephalographic peak alpha frequency  
733 correlates of cognitive traits. *Neurosci Lett.* 2004;371: 60–63. doi:10.1016/j.neulet.2004.08.041
- 734 38. Klimesch W, Doppelmayr M, Schimke H, Ripper B. Theta synchronization and alpha  
735 desynchronization in a memory task. *Psychophysiology.* 1997. pp. 169–176.  
736 doi:10.1111/j.1469-8986.1997.tb02128.x
- 737 39. Grandy TH, Werkle-Bergner M, Chicherio C, Lövdén M, Schmiedek F, Lindenberger U.  
738 Individual alpha peak frequency is related to latent factors of general cognitive abilities.  
739 *Neuroimage.* Elsevier Inc.; 2013;79: 10–18. doi:10.1016/j.neuroimage.2013.04.059
- 740 40. Neubauer A, Freudenthaler H, Pfurtscheller G. Intelligence and spatio-temporal patterns of  
741 event related desynchronization (ERD). *Intelligence.* 1995;20: 249–266.
- 742 41. Escolano C, Aguilar M, Minguez J. EEG-based Upper Alpha Neurofeedback Training Improves  
743 Working Memory Performance. 2011; 2327–2330.
- 744 42. Hanslmayr S, Sauseng P, Doppelmayr M, Schabus M, Klimesch W. Increasing individual upper  
745 alpha power by neurofeedback improves cognitive performance in human subjects. *Appl*  
746 *Psychophysiol Biofeedback.* 2005;30: 1–10. doi:10.1007/s10484-005-2169-8
- 747 43. Escolano C, Navarro-Gil M, Garcia-Campayo J, Minguez J. The Effects of a Single Session of  
748 Upper Alpha Neurofeedback for Cognitive Enhancement: A Sham-Controlled Study. *Appl*  
749 *Psychophysiol Biofeedback.* 2014;39: 227–236. doi:10.1007/s10484-014-9262-9
- 750 44. Gruzelier JH. EEG-neurofeedback for optimising performance. II: Creativity, the performing  
751 arts and ecological validity. *Neurosci Biobehav Rev.* Elsevier Ltd; 2014;44: 142–158.  
752 doi:10.1016/j.neubiorev.2013.11.004
- 753 45. Rogala J, Jurewicz K, Paluch K, Kublik E, Cetnarski R, Wróbel A. The Do's and Don'ts of

- 754 Neurofeedback Training: A Review of the Controlled Studies Using Healthy Adults. *Front Hum*  
755 *Neurosci.* 2016;10: Article 301. doi:10.3389/fnhum.2016.00301
- 756 46. Agnoli S, Zanon M, Mastria S, Avenanti A, Corazza GE. Enhancing creative cognition with a  
757 rapid right-parietal neurofeedback procedure. *Neuropsychologia.* Elsevier Ltd; 2018; 0–1.  
758 doi:10.1016/j.neuropsychologia.2018.02.015
- 759 47. Alexeeva M V, Balios N V, Muravlyova KB, Sapina E V, Bazanova OM. Training for  
760 voluntarily increasing individual upper  $\alpha$  power as a method for cognitive enhancement. *Hum*  
761 *Physiol.* 2012;38: 40–48. doi:10.1134/S0362119711060028
- 762 48. Allen JJB, Harmon-Jones E, Cavender JH. Manipulation of frontal EEG asymmetry through  
763 biofeedback alters self-reported emotional responses and facial EMG. *Psychophysiology.*  
764 2001;38: 685–693. doi:10.1111/1469-8986.3840685
- 765 49. Batty MJ, Bonnington S, Tang BK, Hawken MB, Gruzelier JH. Relaxation strategies and  
766 enhancement of hypnotic susceptibility: EEG neurofeedback, progressive muscle relaxation and  
767 self-hypnosis. *Brain Res Bull.* 2006;71: 83–90. doi:10.1016/j.brainresbull.2006.08.005
- 768 50. Bazanova O, Shtark M. Biofeedback in optimizing psychomotor reactivity: I. Comparison of  
769 biofeedback and common performance practice. *Hum Physiol.* 2007;33: 400–408.  
770 doi:10.1134/S0362119707040044
- 771 51. Van Boxtel GJM, Denissen AJM, Jäger M, Vernon D, Dekker MKJ, Mihajlović V, et al. A  
772 novel self-guided approach to alpha activity training. *Int J Psychophysiol.* 2012;83: 282–294.  
773 doi:10.1016/j.ijpsycho.2011.11.004
- 774 52. Chisholm RC, DeGood DE, Hartz MA. Effects of Alpha Feedback Training on Occipital EEG,  
775 Heart Rate, and Experiential Reactivity to a Laboratory Stressor. *Psychophysiology.* 1977;14:  
776 157–163. doi:10.1111/j.1469-8986.1977.tb03369.x
- 777 53. DeGood DE, Chisholm RC. Multiple Response Comparison of Parietal EEG and Frontalis  
778 EMG Biofeedback. *Psychophysiology.* 1977. pp. 258–265. doi:10.1111/j.1469-  
779 8986.1977.tb01171.x
- 780 54. Dekker MKJ, Sitskoorn MM, Denissen AJM, Van Boxtel GJM. The time-course of alpha  
781 neurofeedback training effects in healthy participants. *Biol Psychol.* Elsevier B.V.; 2014;95:  
782 70–73. doi:10.1016/j.biopsycho.2013.11.014
- 783 55. Egner T, Strawson E, Gruzelier JH. EEG Signature and Phenomenology of Alpha / theta  
784 Neurofeedback Training Versus Mock Feedback. 2002;27: 261–270.
- 785 56. Egner T, Gruzelier J. Ecological validity of neurofeedback: modulation of slow wave EEG  
786 enhance musical performance. *Neuroreport.* 2003;14: 1221–1224.  
787 doi:10.1097/01.wnr.0000081875.45938.d1
- 788 57. Egner T, Zech TF, Gruzelier JH. The effects of neurofeedback training on the spectral  
789 topography of the electroencephalogram. *Clin Neurophysiol.* 2004;115: 2452–2460.  
790 doi:10.1016/j.clinph.2004.05.033



- 791 58. Escolano C, Aguilar M, Minguez J. EEG-based Upper Alpha Neurofeedback Training Improves  
792 Working Memory Performance. 2011; 2327–2330. doi:10.0/Linux-x86\_64
- 793 59. Escolano C, Olivan B, Lopez-Del-Hoyo Y, Garcia-Campayo J, Minguez J. Double-blind single-  
794 session neurofeedback training in upper-alpha for cognitive enhancement of healthy subjects.  
795 Proc Annu Int Conf IEEE Eng Med Biol Soc EMBS. 2012; 4643–4647.  
796 doi:10.1109/EMBC.2012.6347002
- 797 60. Escolano C, Navarro-Gil M, Garcia-Campayo J, Minguez J. The Effects of a Single Session of  
798 Upper Alpha Neurofeedback for Cognitive Enhancement: A Sham-Controlled Study. Appl  
799 Psychophysiol Biofeedback. 2014;39: 227–236. doi:10.1007/s10484-014-9262-9
- 800 61. Gruzelier JH, Holmes P, Hirst L, Bulpin K, Rahman S, van Run C, et al. Replication of elite  
801 music performance enhancement following alpha/theta neurofeedback and application to novice  
802 performance and improvisation with SMR benefits. Biol Psychol. Elsevier B.V.; 2014;95: 96–  
803 107. doi:10.1016/j.biopsycho.2013.11.001
- 804 62. Gruzelier JH, Foks M, Steffert T, Chen MJL, Ros T. Beneficial outcome from EEG-  
805 neurofeedback on creative music performance, attention and well-being in school children. Biol  
806 Psychol. Elsevier B.V.; 2014;95: 86–95. doi:10.1016/j.biopsycho.2013.04.005
- 807 63. Gruzelier JH, Thompson T, Redding E, Brandt R, Steffert T. Application of alpha/theta  
808 neurofeedback and heart rate variability training to young contemporary dancers: State anxiety  
809 and creativity. Int J Psychophysiol. Elsevier B.V.; 2014;93: 105–111.  
810 doi:10.1016/j.ijpsycho.2013.05.004
- 811 64. Guez J, Rogel A, Getter N, Keha E, Cohen T, Amor T, et al. Influence of  
812 electroencephalography neurofeedback training on episodic memory: A randomized, sham-  
813 controlled, double-blind study. Memory. Taylor & Francis; 2015;23: 683–694.  
814 doi:10.1080/09658211.2014.921713
- 815 65. Hsueh JJ, Chen TS, Chen JJ, Shaw FZ. Neurofeedback training of EEG alpha rhythm enhances  
816 episodic and working memory. Hum Brain Mapp. 2016;37: 2662–2675.  
817 doi:10.1002/hbm.23201
- 818 66. Imperatori C, Della Marca G, Amoroso N, Maestoso G, Valenti EM, Massullo C, et al.  
819 Alpha/Theta Neurofeedback Increases Mentalization and Default Mode Network Connectivity  
820 in a Non-Clinical Sample. Brain Topogr. Springer US; 2017;30: 822–831. doi:10.1007/s10548-  
821 017-0593-8
- 822 67. Konareva IN. Modifications of the EEG frequency pattern in humans related to a single  
823 neurofeedback session. Neurophysiology. 2005;37: 388–395. doi:10.1007/s11062-006-0015-0
- 824 68. Nan W, Wan F, Lou CI, Vai MI, Rosa A. Peripheral Visual Performance Enhancement by  
825 Neurofeedback Training. Appl Psychophysiol Biofeedback. 2013;38: 285–291.  
826 doi:10.1007/s10484-013-9233-6
- 827 69. Raymond J, Sajid I, Parkinson LA, Gruzelier JH. Biofeedback and dance performance: A

- 828 preliminary investigation. *Appl Psychophysiol Biofeedback*. 2005;30: 65–73.  
829 doi:10.1007/s10484-005-2175-x
- 830 70. Reis J, Portugal A, Pereira MR, Dias N. Alpha and theta intensive neurofeedback protocol for  
831 age-related cognitive deficits. *Int IEEE/EMBS Conf Neural Eng NER*. 2015;2015–July: 715–  
832 718. doi:10.1109/NER.2015.7146723
- 833 71. Ring C, Cooke A, Kavussanu M, McIntyre D, Masters R. Investigating the efficacy of  
834 neurofeedback training for expediting expertise and excellence in sport. *Psychol Sport Exerc*.  
835 Elsevier Ltd; 2015;16: 118–127. doi:10.1016/j.psychsport.2014.08.005
- 836 72. Ros T, Moseley MJ, Bloom PA, Benjamin L, Parkinson LA, Gruzelier JH. Optimizing  
837 microsurgical skills with EEG neurofeedback. *BMC Neurosci*. 2009;10: 87–97.  
838 doi:10.1186/1471-2202-10-87
- 839 73. Ros T, Munneke MAM, Ruge D, Gruzelier JH, Rothwell JC. Endogenous control of waking  
840 brain rhythms induces neuroplasticity in humans. *Eur J Neurosci*. 2010;31: 770–778.  
841 doi:10.1111/j.1460-9568.2010.07100.x
- 842 74. Ros T, Théberge J, Frewen PA, Kluetsch R, Densmore M, Calhoun VD, et al. Mind over chatter:  
843 Plastic up-regulation of the fMRI salience network directly after EEG neurofeedback.  
844 *Neuroimage*. Elsevier Inc.; 2013;65: 324–335. doi:10.1016/j.neuroimage.2012.09.046
- 845 75. Xiong S, Cheng C, Wu X, Guo X, Yao L, Zhang J. Working memory training using EEG  
846 neurofeedback in normal young adults. *Biomed Mater Eng*. 2014;24: 3637–3644.  
847 doi:10.3233/BME-141191
- 848 76. Ekanayake H. P300 and Emotiv EPOC: Does Emotiv EPOC capture real EEG? Web Publ  
849 [http://neurofeedback visaduma info/ ...](http://neurofeedback.visaduma.info/...) 2010; 16. Available:  
850 <http://www.visaduma.info/neurofeedback/P300nEmotiv.pdf>
- 851 77. Liu Y, Jiang X, Cao T, Wan F, Mak PU, Mak PI, et al. Implementation of SSVEP based BCI  
852 with Emotiv EPOC. *Proc IEEE Int Conf Virtual Environ Human-Computer Interfaces, Meas*  
853 *Syst*. 2012; 34–37. doi:10.1109/VECIMS.2012.6273184
- 854 78. Brunner P, Bianchi L, Guger C, Cincotti F, Schalk G. Current trends in hardware and software  
855 for brain-computer interfaces (BCIs). *J Neural Eng*. 2011;8: 025001. doi:10.1088/1741-  
856 2560/8/2/025001
- 857 79. Hinz A, Daig I, Petrowski K, Brähler E. Die Stimmung in der deutschen Bevölkerung:  
858 Referenzwerte für den Mehrdimensionalen Befindlichkeitsfragebogen MDBF. *Psychother*  
859 *Psychosom Med Psychol*. 2012;62: 52–57. doi:10.1055/s-0031-1297960
- 860 80. Herning RI, Better W, Tate K, Cadet JL. EEG deficits in chronic marijuana abusers during  
861 monitored abstinence: Preliminary findings. Slikker, William (Ed); Andrews, Russell J (Ed); al  
862 *Neuroprotective agents Sixth Int Conf Ann New York Acad Sci Vol 993*. 2003;78: 75–78.
- 863 81. Volavka J, Crown P, Dornbush R, Feldstein S, Fink M. EEG, heart rate and mood change  
864 (“high”) after Cannabis. *Psychopharmacologia*. 1973;32: 11–25. doi:10.1007/BF00421704

- 865 82. Lukas SE, Mendelson JH, Benedikt RA, Jones B. EEG alpha activity increases during transient  
866 episodes of ethanol-induced euphoria. *Pharmacol Biochem Behav.* 1986;25: 889–895.  
867 doi:10.1016/0091-3057(86)90403-X
- 868 83. Beckers G, Hömberg V. Impairment of visual perception and visual short term memory  
869 scanning by transcranial magnetic stimulation of occipital cortex. *Exp Brain Res.* 1991;87: 421–  
870 432. doi:10.1007/BF00231859
- 871 84. Behrmann M, Geng JJ, Shomstein S. Parietal cortex and attention. *Curr Opin Neurobiol.*  
872 2004;14: 212–217. doi:10.1016/j.conb.2004.03.012
- 873 85. Delorme A, Makeig S. EEGLAB: an open source toolbox for analysis of single-trial EEG  
874 dynamics including independent component analysis. *J Neurosci Methods.* 2004;134: 9–21.  
875 doi:10.1016/j.jneumeth.2003.10.009
- 876 86. Mueller ST, Piper BJ. The Psychology Experiment Building Language (PEBL) and PEBL Test  
877 Battery. *J Neurosci Methods.* Elsevier B.V.; 2014;222: 250–259.  
878 doi:10.1016/j.jneumeth.2013.10.024
- 879 87. R Core Team. R: A language and environment for statistical computing [Internet]. Vienna,  
880 Austria; 2013. Available: <http://www.r-project.org/>
- 881 88. Pruessner JC, Kirschbaum C, Meinlschmid G, Hellhammer DH. Two formulas for computation  
882 of the area under the curve represent measures of total hormone concentration versus time-  
883 dependent change. *Psychoneuroendocrinology.* 2003;28: 916–931. doi:10.1016/S0306-  
884 4530(02)00108-7
- 885 89. Team RC. R: A language and environment for statistical computing. R Foundation for Statistical  
886 Computing, Vienna, Austria. <http://wwwR-project.org/>. 2013; 2013.  
887 doi:10.1348/000712608X366867
- 888 90. Cahn BR, Polich J. Meditation states and traits: EEG, ERP, and neuroimaging studies. *Psychol*  
889 *Bull.* 2006;132: 180–211. doi:10.1037/0033-2909.132.2.180
- 890 91. Kasamatsu A, Hirai T. an Electroencephalographic Study on the Zen Meditation (Zazen).  
891 *Psychiatry Clin Neurosci.* 1966;20: 315–336. doi:10.1111/j.1440-1819.1966.tb02646.x
- 892 92. Lagopoulos J, Xu J, Rasmussen I, Vik A, Malhi GS, Eliassen CF, et al. Increased theta and  
893 alpha EEG activity during nondirective meditation. *J Altern Complement Med.* 2009;15: 1187–  
894 1192. doi:10.1089/acm.2009.0113
- 895 93. Thibault RT, Lifshitz M, Raz A. The self-regulating brain and neurofeedback: Experimental  
896 science and clinical promise. *Cortex.* Elsevier Ltd; 2016;74: 247–261.  
897 doi:10.1016/j.cortex.2015.10.024
- 898 94. McCambridge J, Witton J, Elbourne DR. Systematic review of the Hawthorne effect: New  
899 concepts are needed to study research participation effects. *J Clin Epidemiol.* Elsevier Inc;  
900 2014;67: 267–277. doi:10.1016/j.jclinepi.2013.08.015

- 901 95. Reis J, Portugal AM, Fernandes L, Afonso N, Pereira M, Sousa N, et al. An alpha and theta  
902 intensive and short neurofeedback protocol for healthy aging working-memory training. *Front*  
903 *Aging Neurosci.* 2016;8. doi:10.3389/fnagi.2016.00157
- 904 96. Etherton JL, Bianchini KJ, Greve KW, Heinly MT, Etherton JL, Bianchini KJ, et al. Sensitivity  
905 and Specificity of Reliable Digit Span in Malingered Pain-Related Disability. *Sage Publ.*  
906 2005;12: 130–136. doi:10.1177/1073191105274859
- 907 97. Ros T, Munneke MAM, Parkinson LA, Gruzelier JH. Neurofeedback facilitation of implicit  
908 motor learning. *Biol Psychol.* Elsevier B.V.; 2013;95: 54–58.  
909 doi:10.1016/j.biopsycho.2013.04.013
- 910 98. Liu Y, Hou X, Sourina O. Fractal Dimension Based Neurofeedback Training to Improve  
911 Cognitive Abilities. *Comput Sci Electron Eng Conf.* 2015;7: 152–156.  
912 doi:10.1109/CEEC.2015.7332716
- 913

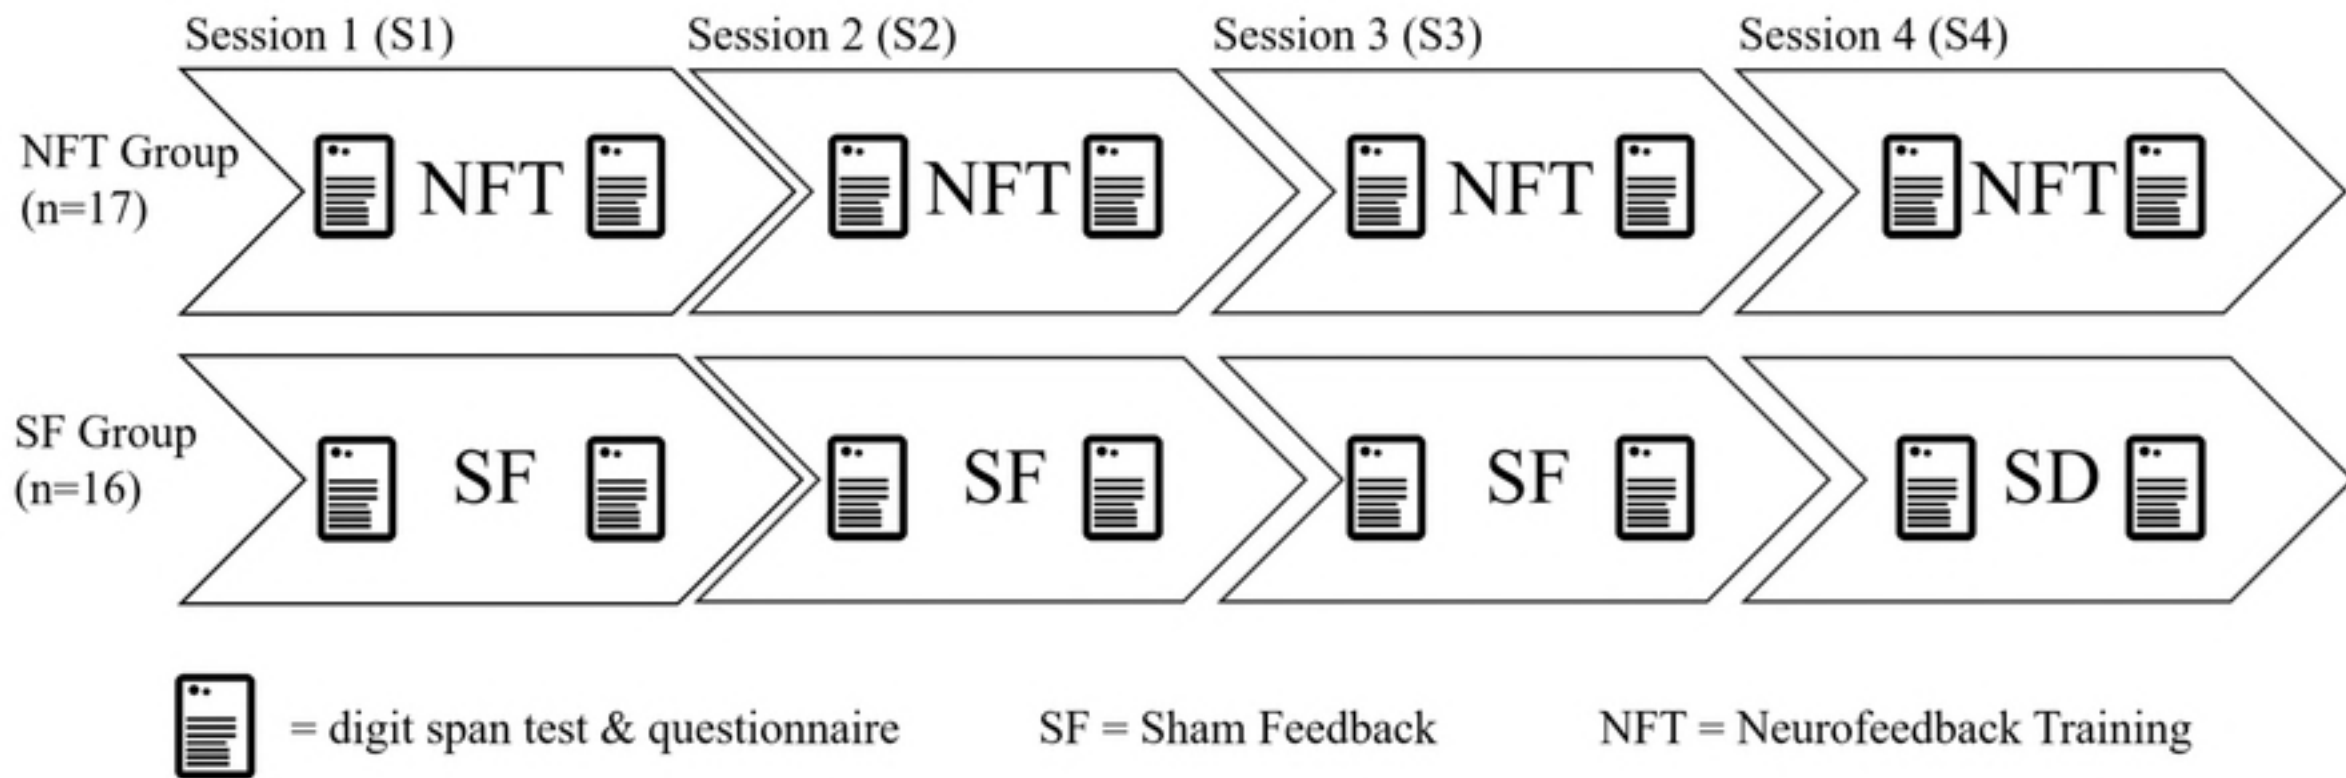

Figure

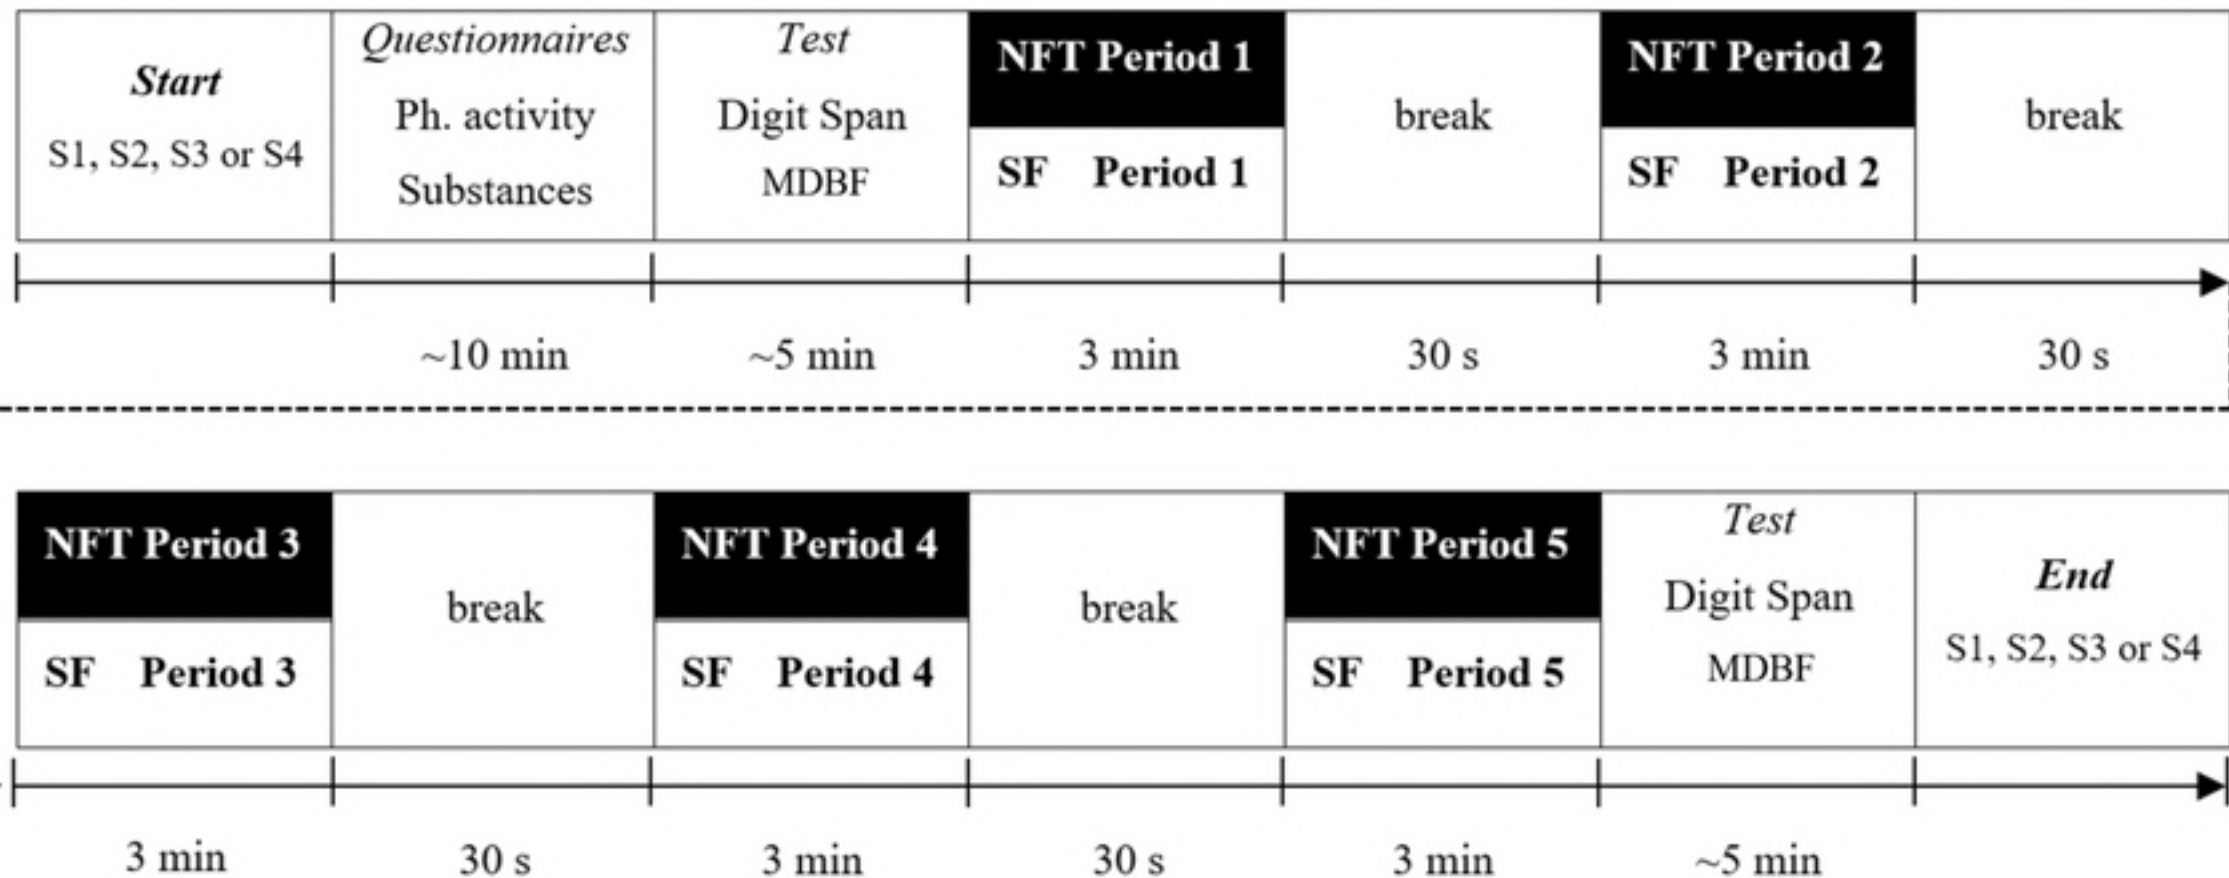

Figure

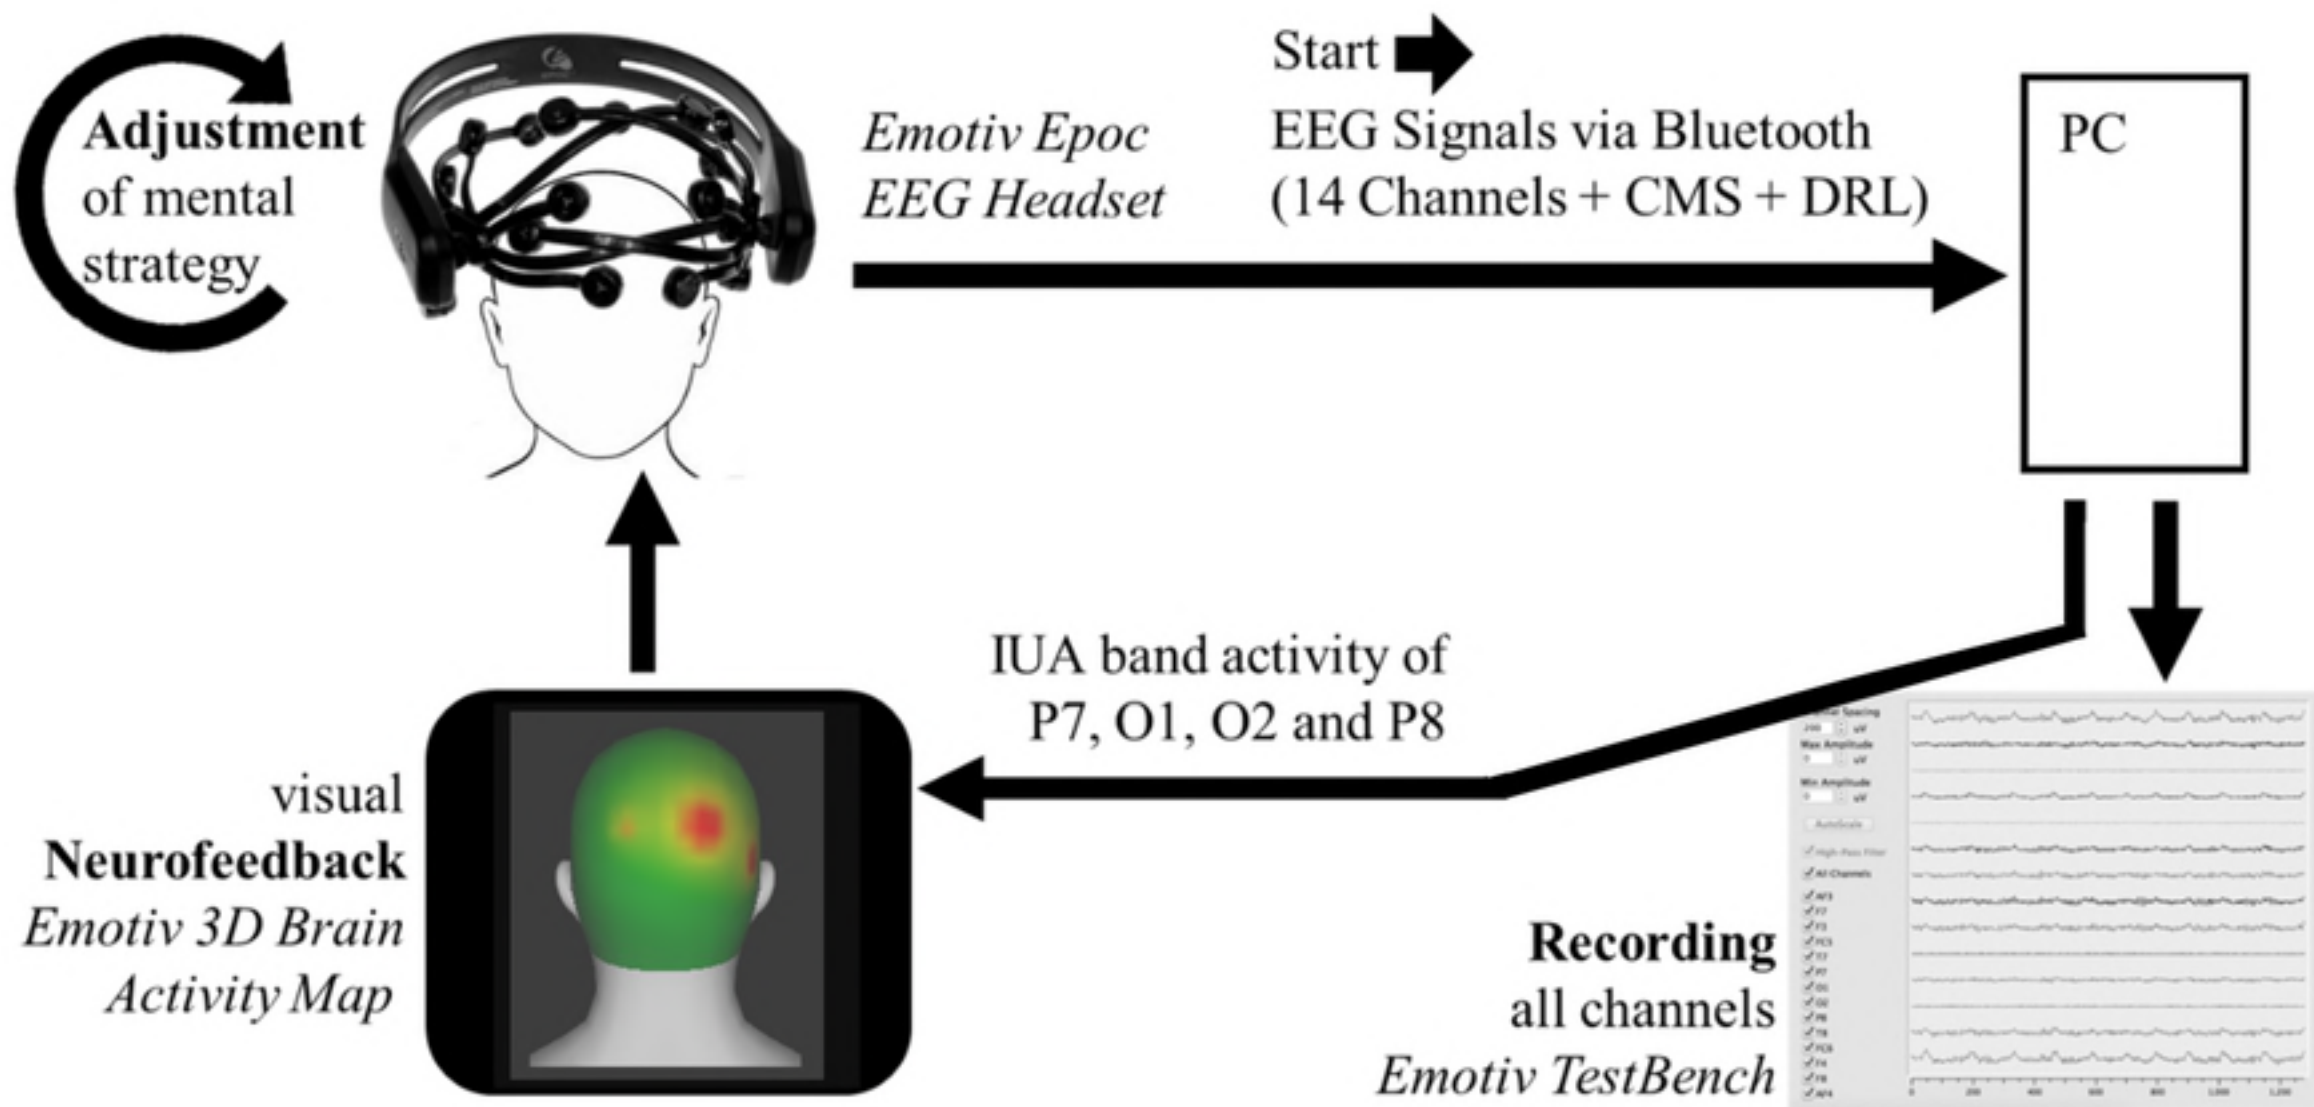

Figure

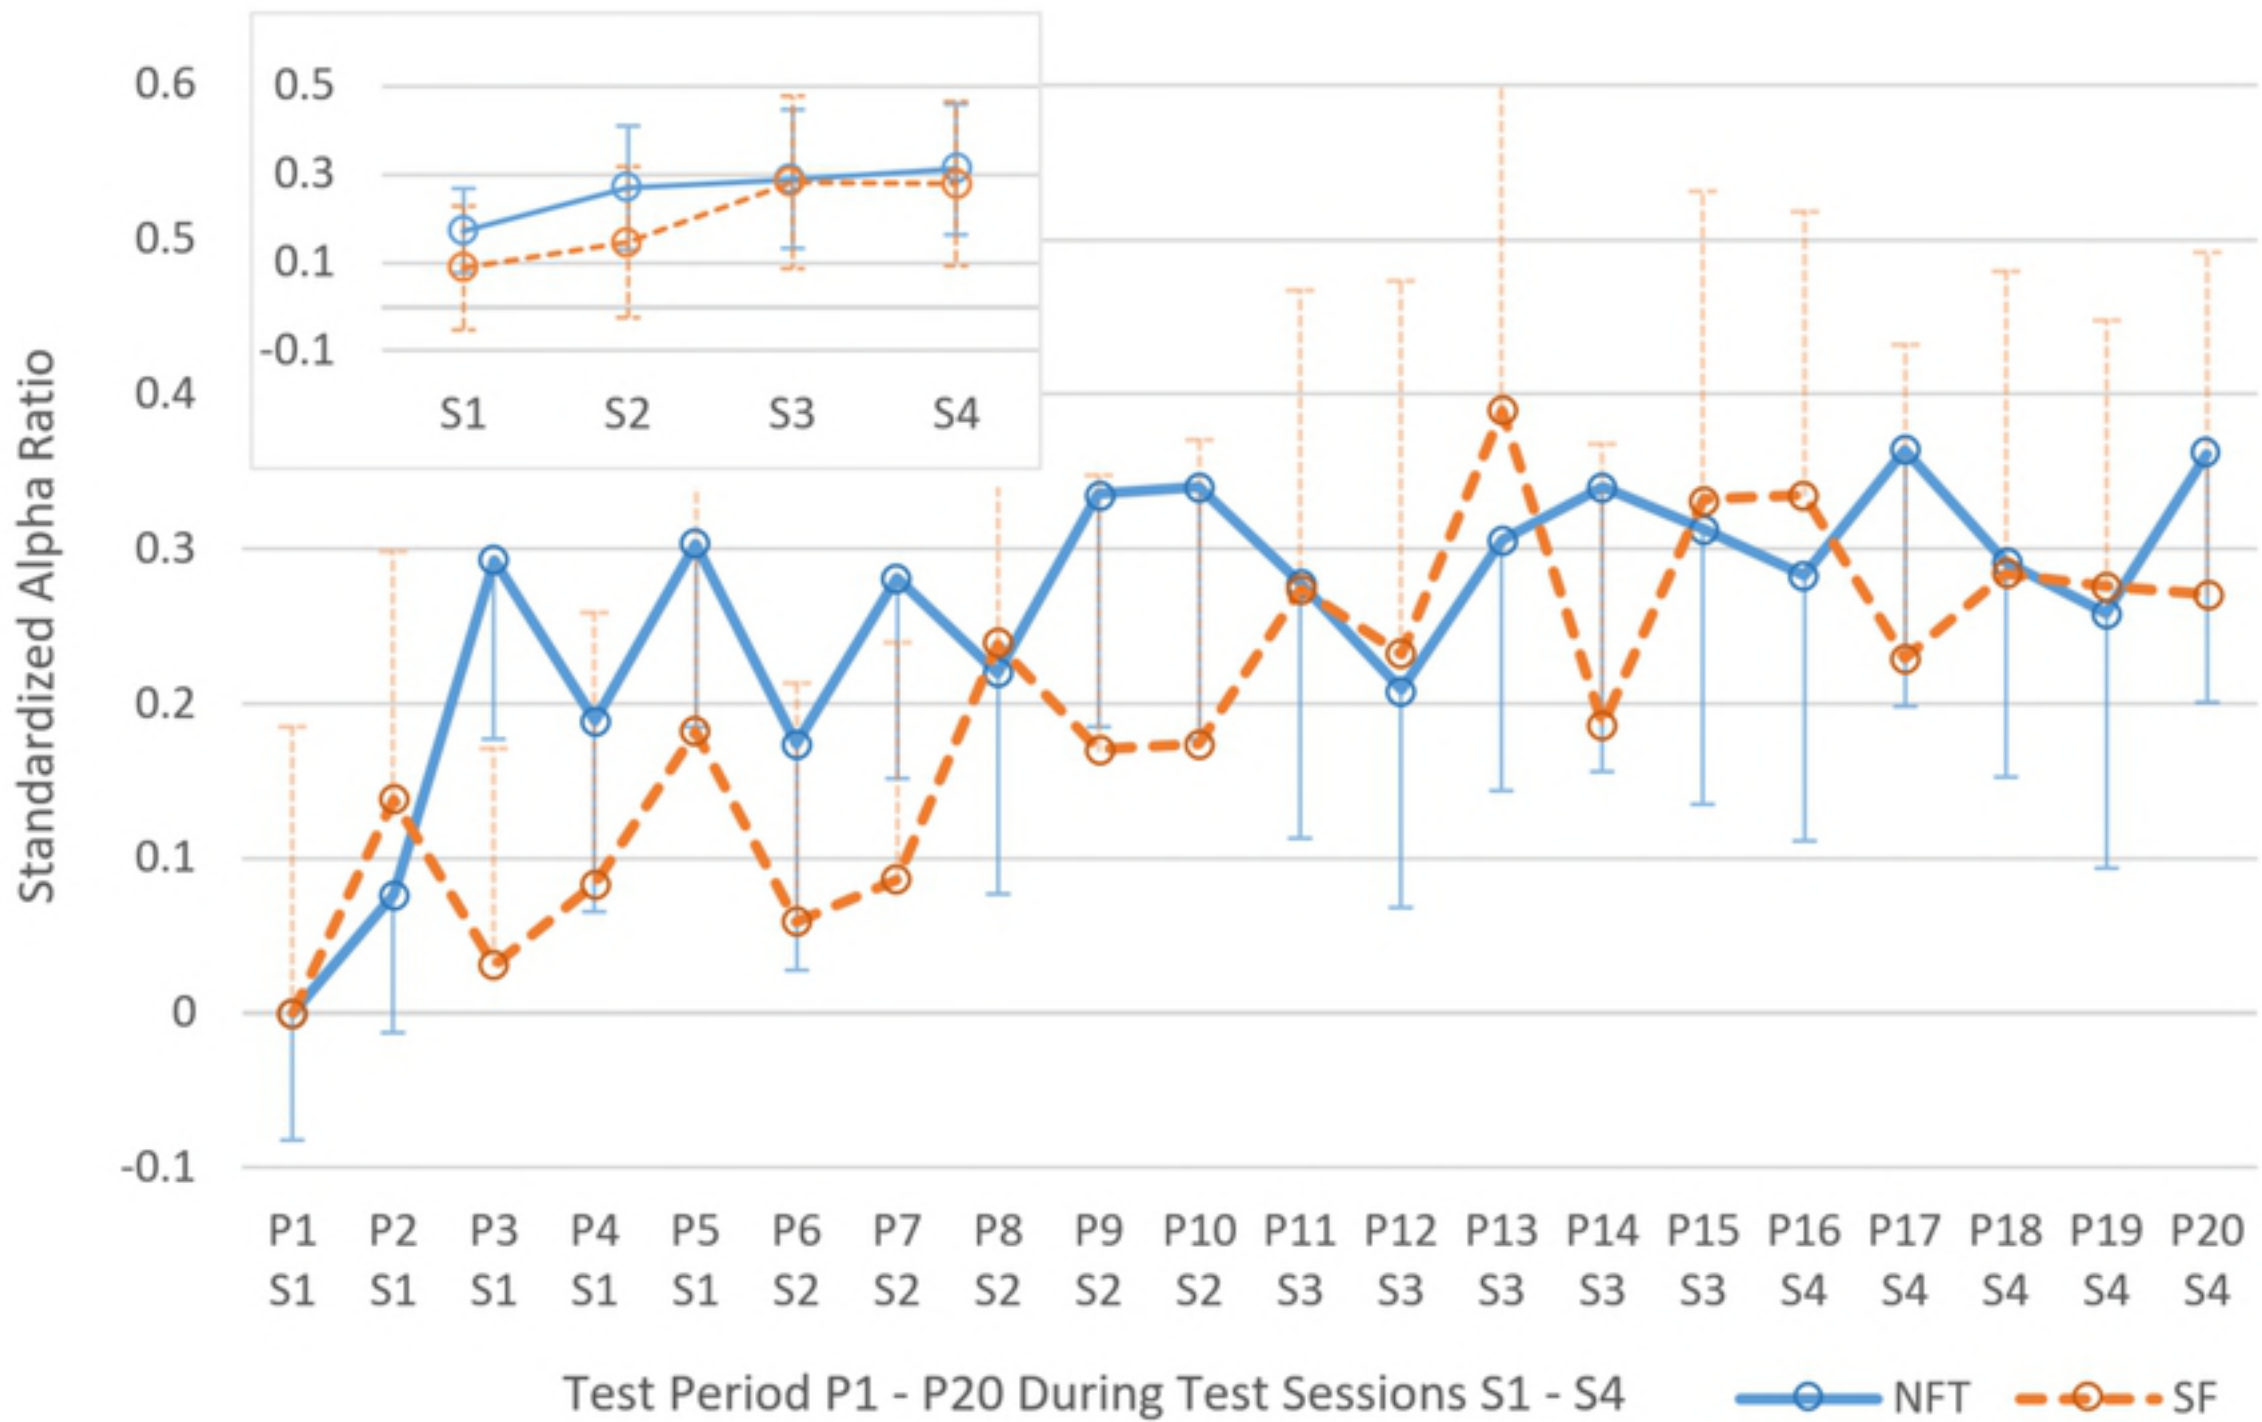

Figure



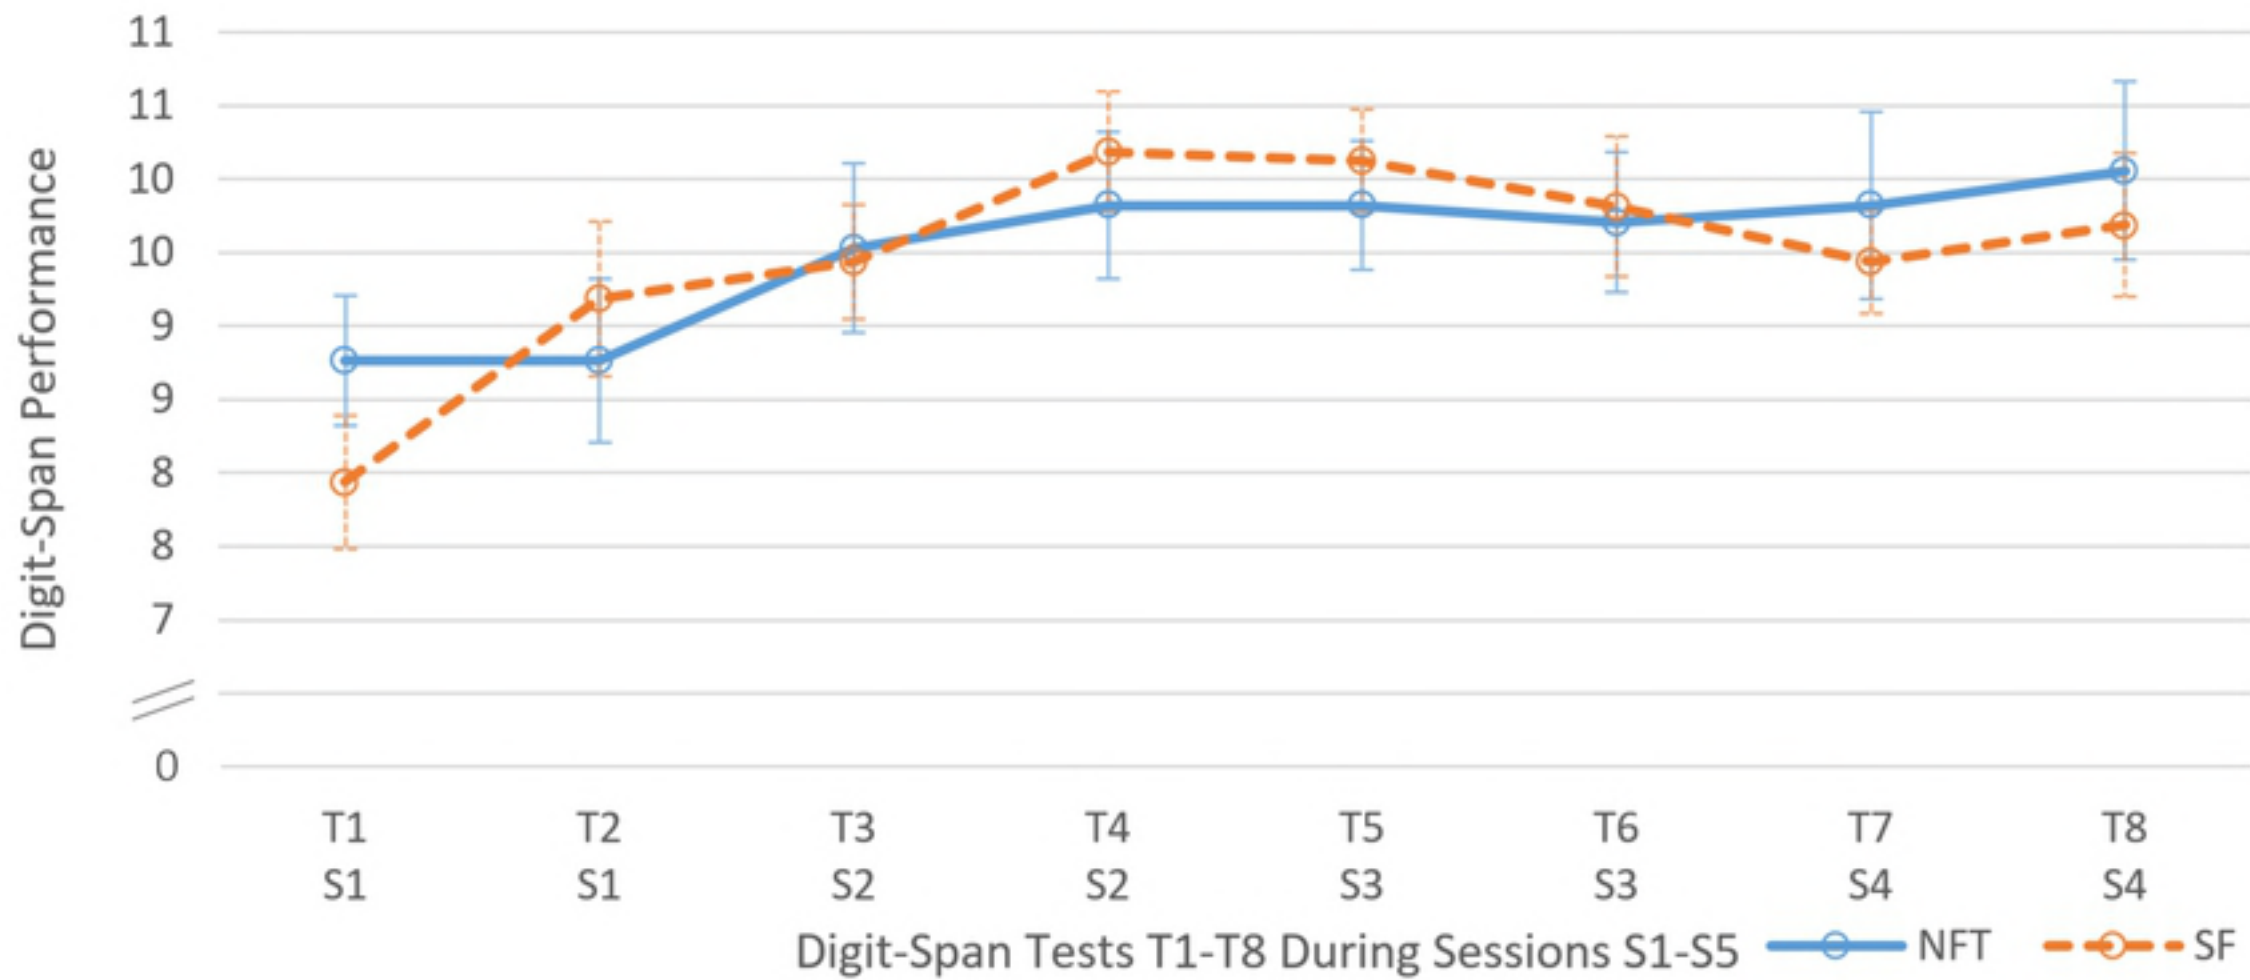

Figure

1010  
Digit-Span Performance

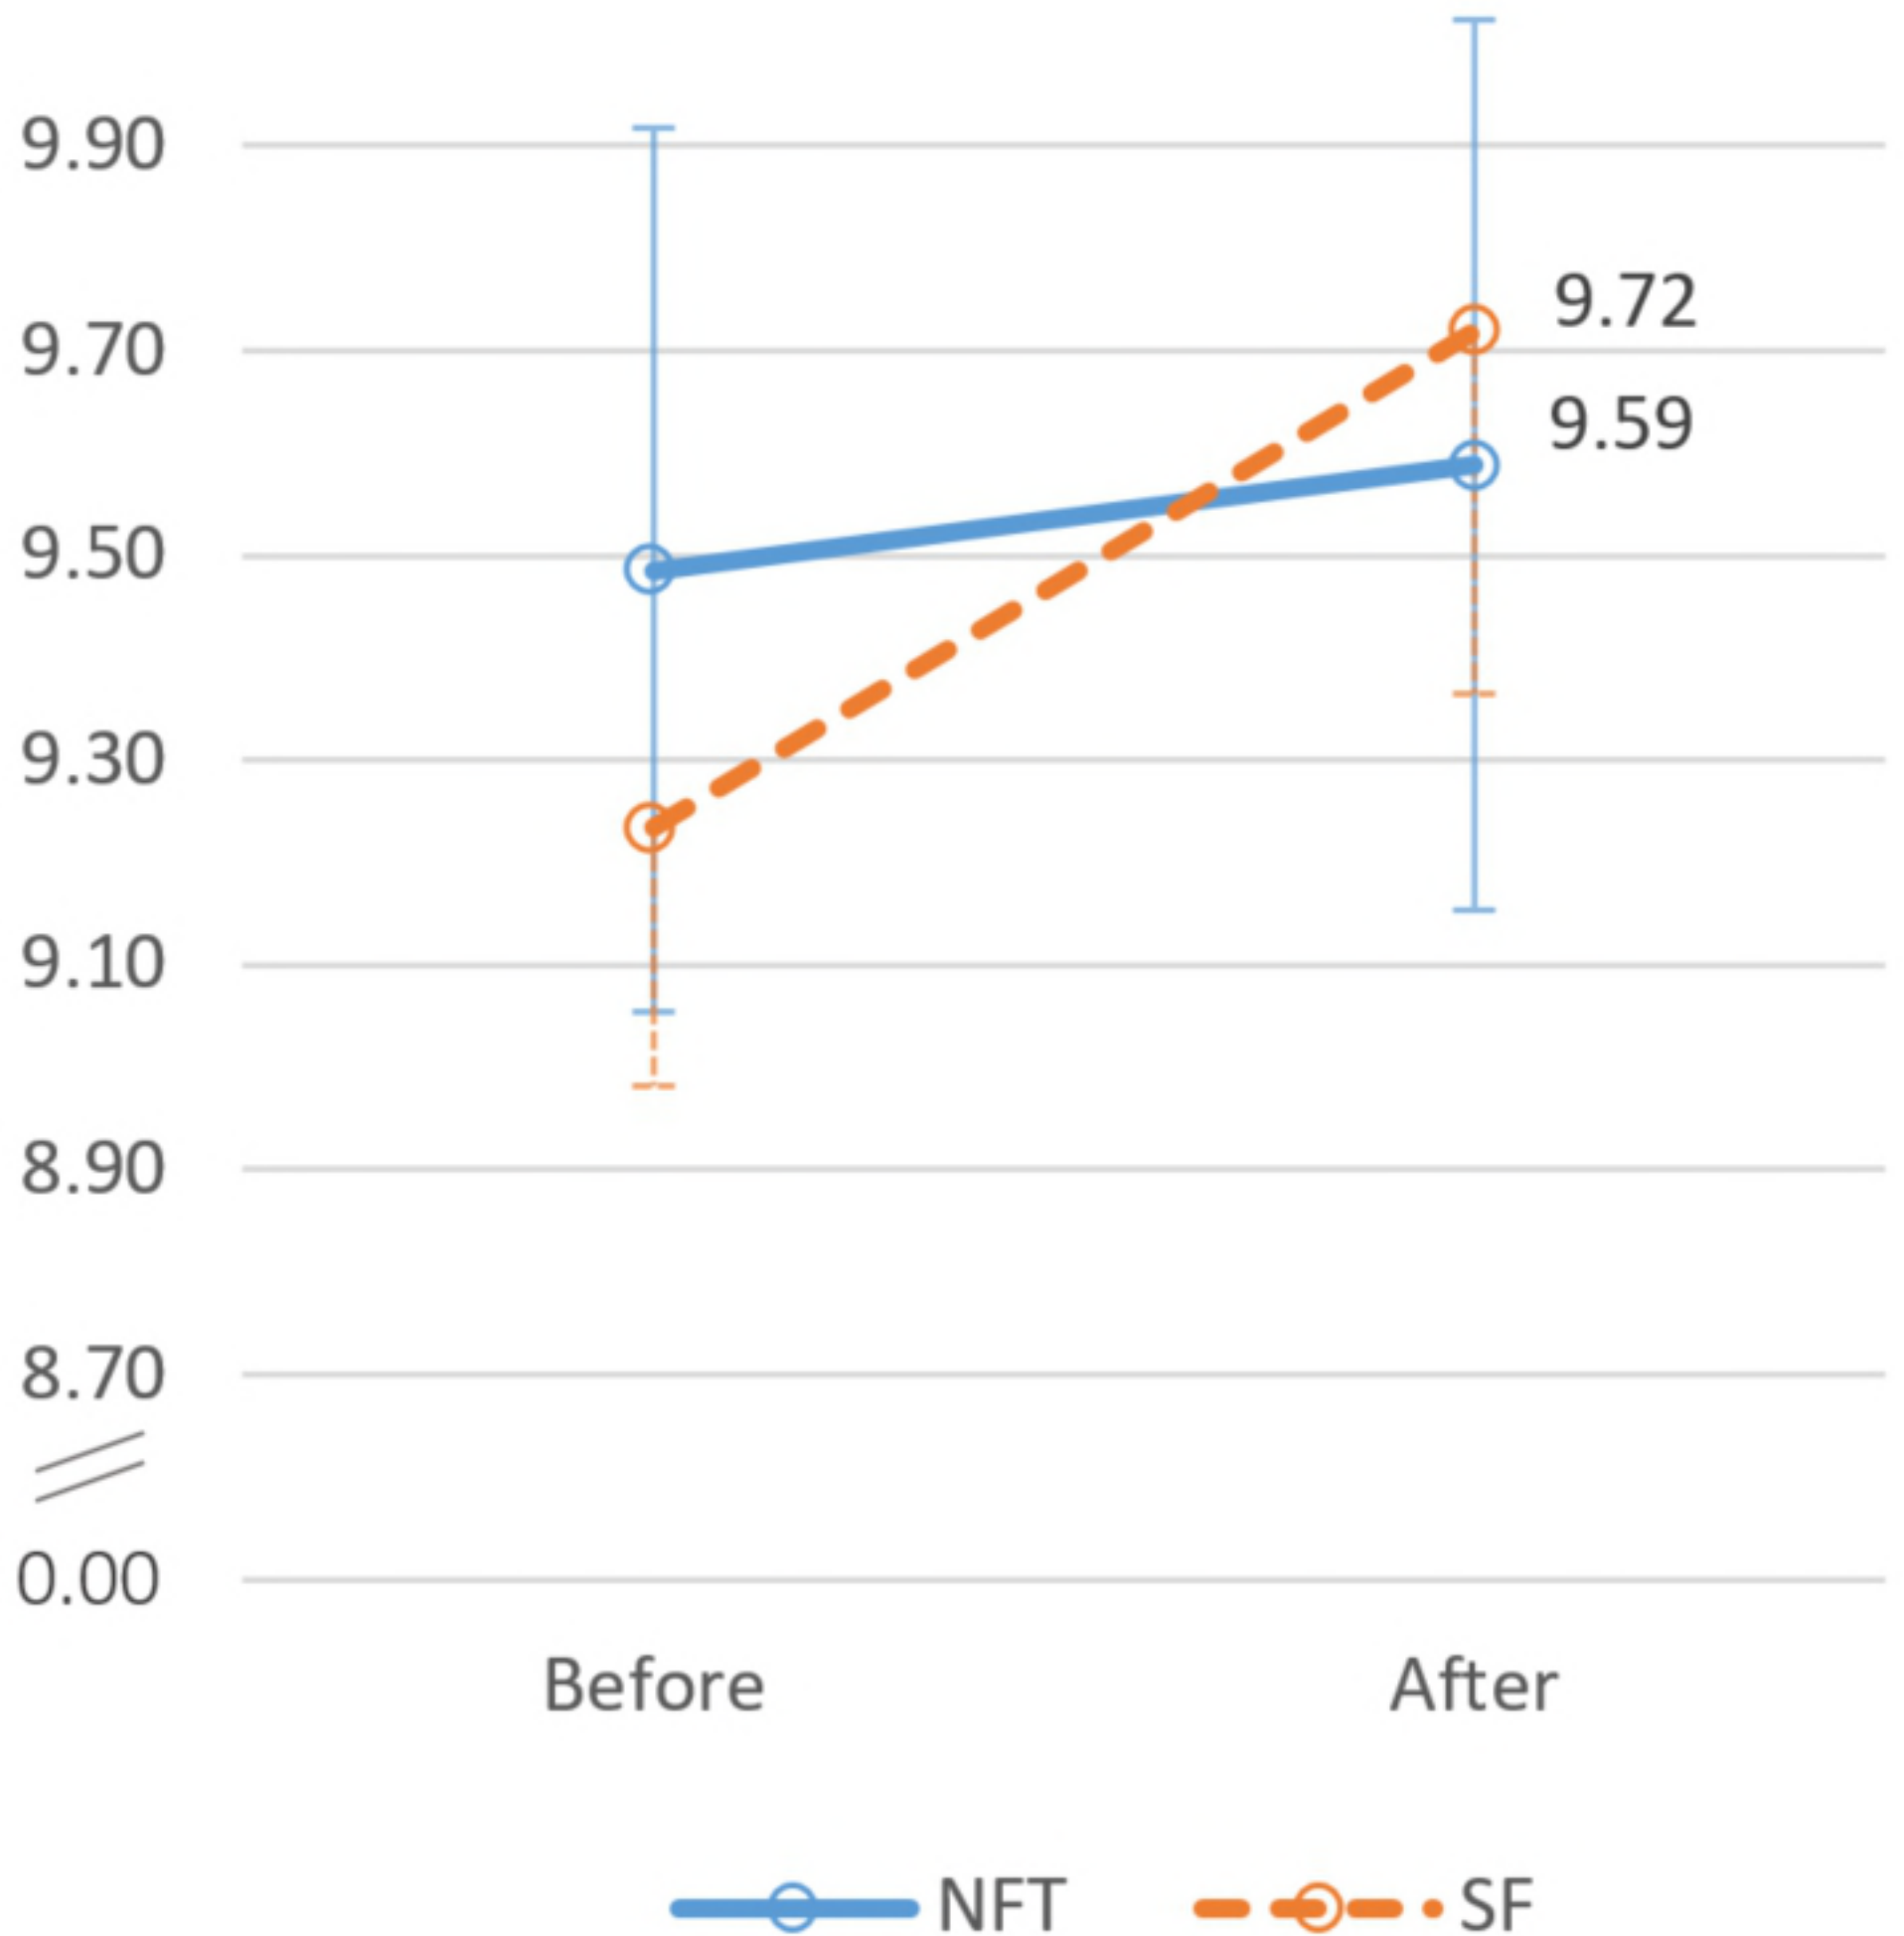

Figure

A

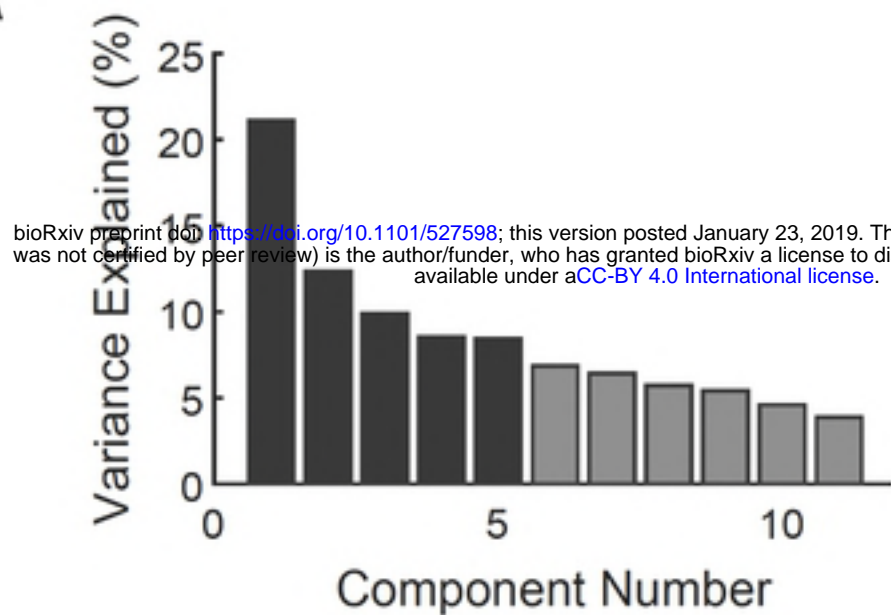

B

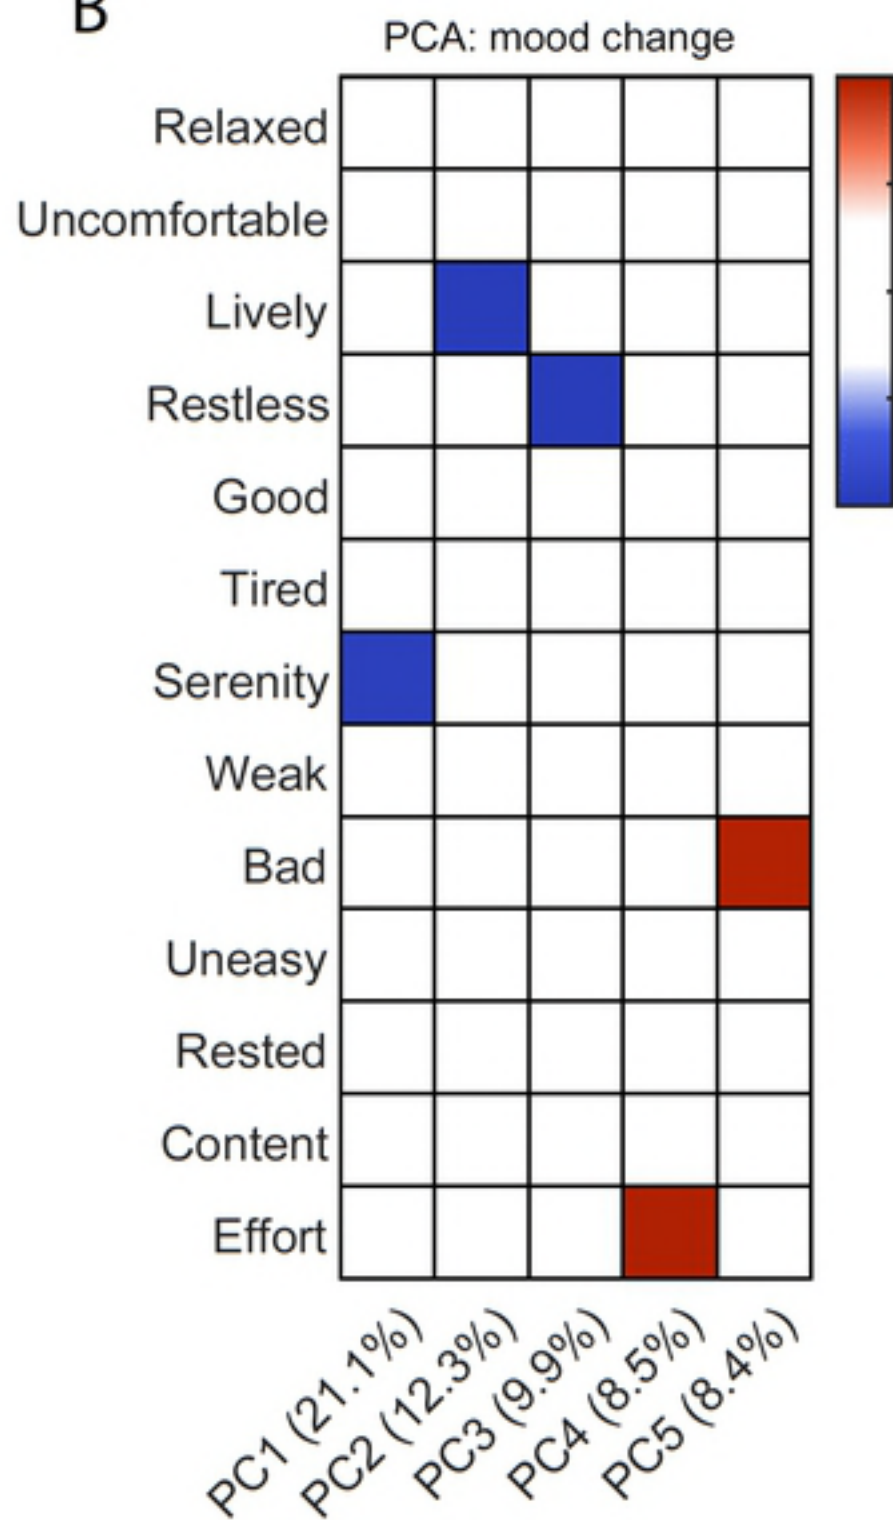

C

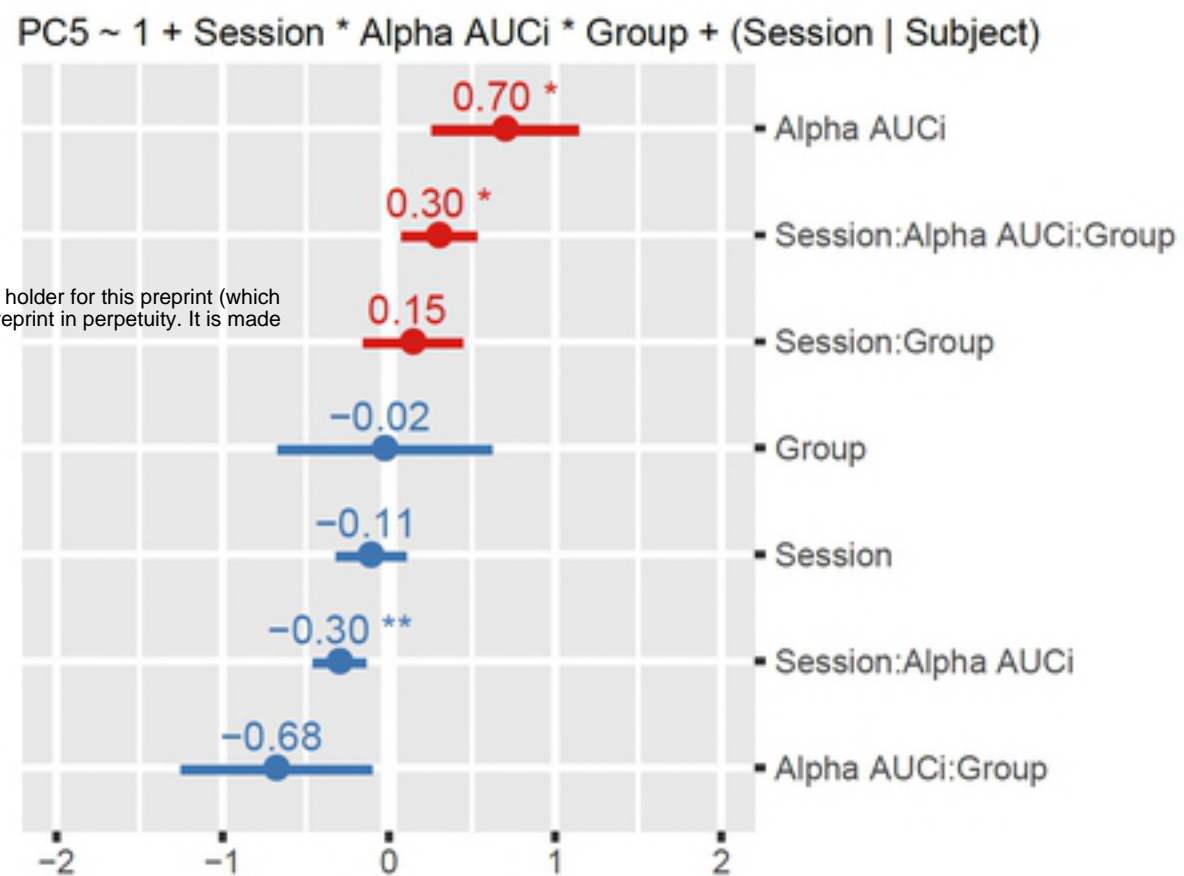

D

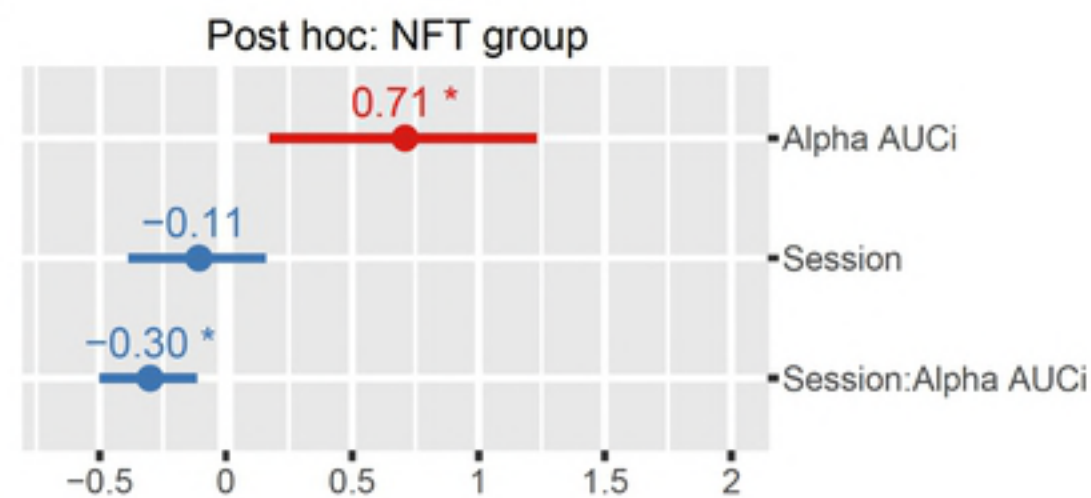

E

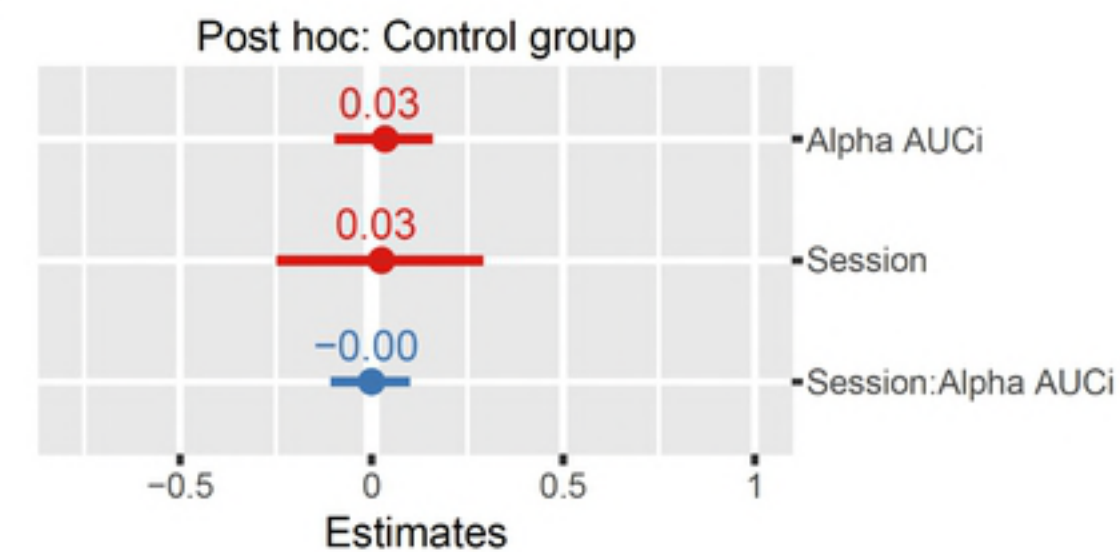

Alpha AUC<sub>i</sub> ~ 1 + Relaxed \* Group + (Session | ID)

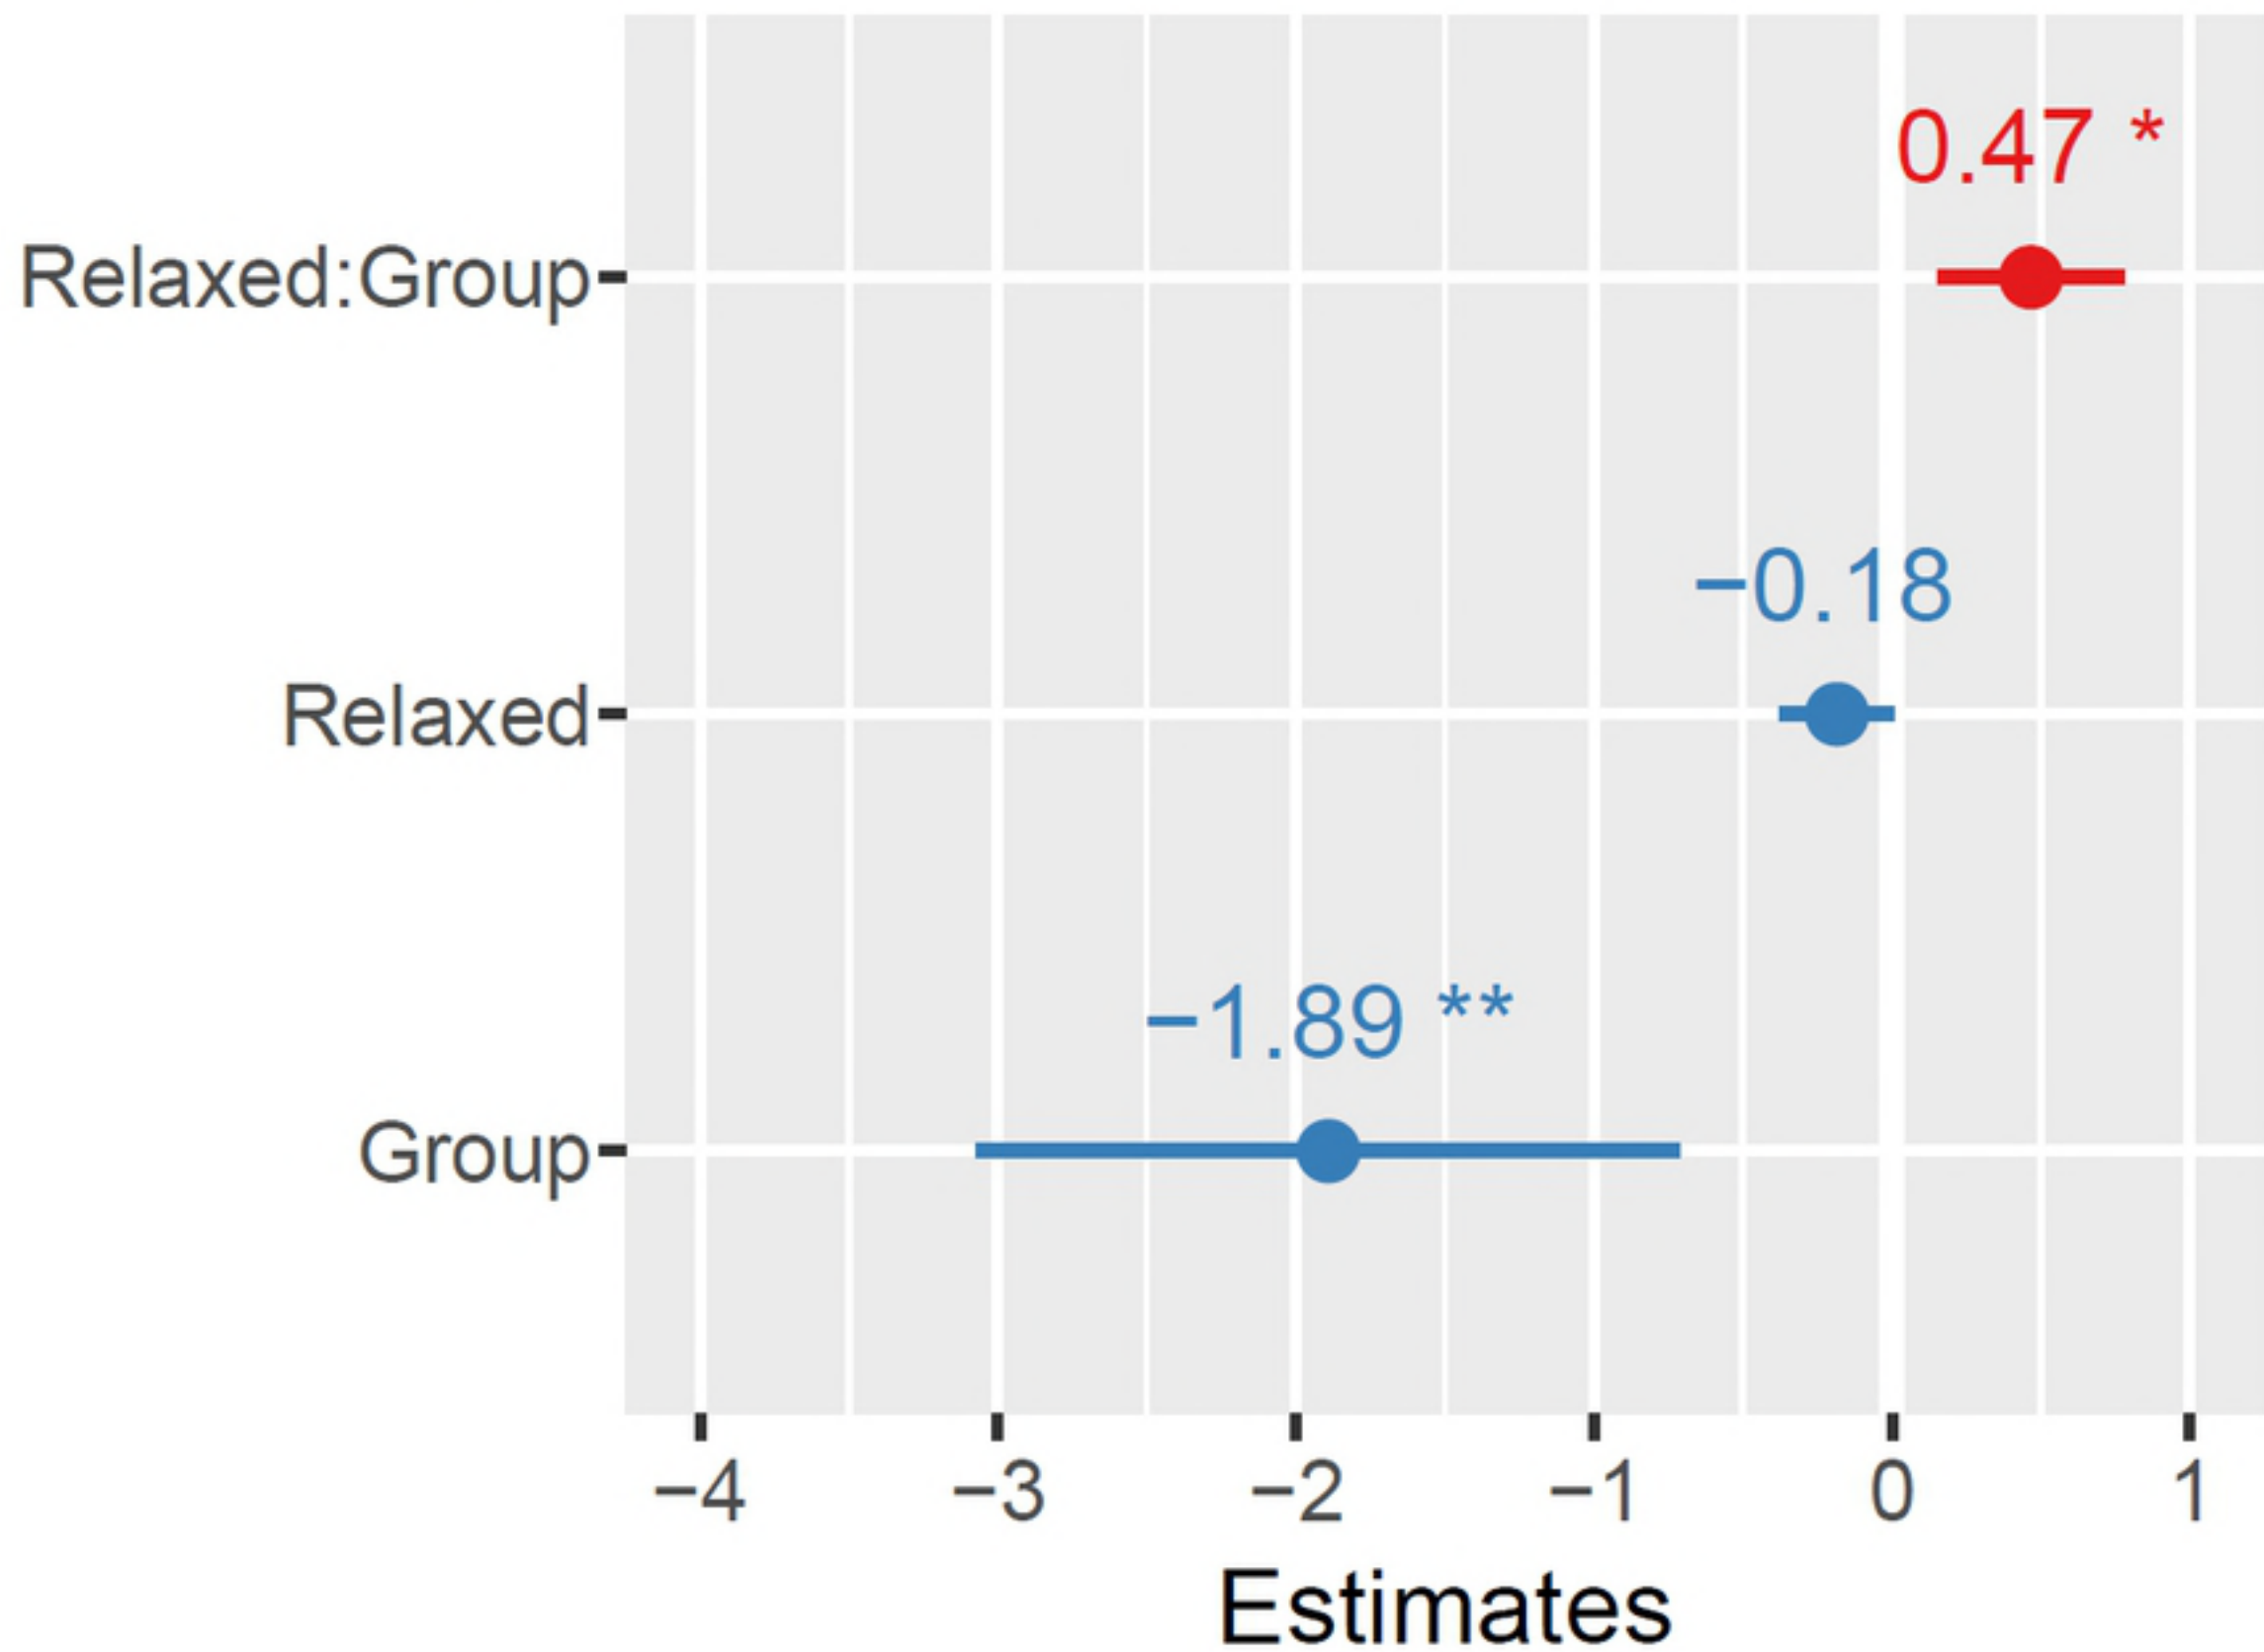

Figure
